# Supplementary material
Source: PubMed Central journal article supplement (PMC5148658)
Supplement: NIHMS818426-supplement-Supplementary_data.pdf [file NIHMS818426-supplement-Supplementary_data.pdf]

**Appendix A: Search strategy and search results.**

Searches were performed at <http://arvojournals.org/Solr/advancedSearch.aspx> in January 2015.

| #  | Search term                                              | 2010        | 2009        | 2008        | 2007        |
|----|----------------------------------------------------------|-------------|-------------|-------------|-------------|
|    | <b>Total number of abstracts presented</b>               | <b>6310</b> | <b>6236</b> | <b>6058</b> | <b>5893</b> |
| 1  | diagnostic accuracy (all)                                | 26          | 16          | 17          | 11          |
| 2  | sensitivity specificity (all)                            | 91          | 77          | 92          | 74          |
| 3  | sensitivity specific (all)                               | 49          | 44          | 55          | 40          |
| 4  | sensitive specificity (all)                              | 12          | 11          | 15          | 11          |
| 5  | sensitive specific (all)                                 | 46          | 51          | 40          | 34          |
| 6  | "true positive rate" (all)                               | 1           | 0           | 0           | 0           |
| 7  | "false positive rate" (all)                              | 4           | 6           | 3           | 5           |
| 8  | "true positive ratio" (all)                              | 1           | 0           | 0           | 0           |
| 9  | "false positive ratio" (all)                             | 1           | 0           | 0           | 0           |
| 10 | "true positive fraction" (all)                           | 0           | 0           | 0           | 0           |
| 11 | "false positive fraction" (all)                          | 0           | 0           | 0           | 0           |
| 12 | TPR FPR TPF FPF (any)                                    | 0           | 0           | 1           | 0           |
| 13 | "predictive value" (all)                                 | 25          | 26          | 23          | 27          |
| 14 | "predictive values" (all)                                | 8           | 4           | 7           | 3           |
| 15 | PPV NPV (all)                                            | 6           | 2           | 8           | 4           |
| 16 | "likelihood ratio" (all)                                 | 2           | 3           | 4           | 4           |
| 17 | "likelihood ratios" (all)                                | 2           | 2           | 3           | 1           |
| 18 | "diagnostic odds ratio" (all)                            | 0           | 0           | 0           | 0           |
| 19 | "diagnostic odds ratios" (all)                           | 0           | 0           | 1           | 0           |
| 20 | DOR (all)                                                | 0           | 1           | 0           | 0           |
| 21 | AUC ROC AUROC AUCROC (any)                               | 76          | 65          | 55          | 33          |
| 22 | "AUC-ROC" (all)                                          | 0           | 0           | 2           | 0           |
| 23 | "receiver operating" (all)                               | 34          | 28          | 32          | 23          |
| 24 | "receiver operator" (all)                                | 7           | 6           | 3           | 3           |
| 25 | "c statistic" (all)                                      | 0           | 1           | 0           | 2           |
| 26 | "c index" (all)                                          | 2           | 1           | 0           | 1           |
| 27 | youden (all)                                             | 0           | 0           | 1           | 0           |
| 28 | "diagnostic performance" (all)                           | 18          | 9           | 9           | 5           |
| 29 | "diagnostic ability" (all)                               | 11          | 7           | 6           | 2           |
| 30 | "discriminative ability" (all)                           | 3           | 0           | 1           | 1           |
| 31 | "gold standard" (all)                                    | 30          | 27          | 34          | 21          |
| 32 | "reference standard" (all)                               | 9           | 9           | 11          | 2           |
| 33 | "reference test" (all)                                   | 2           | 0           | 0           | 0           |
| 34 | "index test" (all)                                       | 0           | 0           | 0           | 0           |
|    | <b>Results before deduplication</b>                      | <b>466</b>  | <b>396</b>  | <b>423</b>  | <b>307</b>  |
|    | <b>Results after deduplication</b>                       | <b>271</b>  | <b>246</b>  | <b>243</b>  | <b>198</b>  |
|    | <b>Abstracts of diagnostic accuracy studies included</b> | <b>126</b>  | <b>96</b>   | <b>102</b>  | <b>75</b>   |

**Appendix B: List of included abstracts (n=399).**

Abstracts included per year of presentation:

2007: n=75<sup>1-75</sup>; 2008: n=102<sup>76-177</sup>; 2009: n=96<sup>178-273</sup>; 2010: n=126<sup>274-399</sup>.

- (1) Adams RJ, Drover JR, Kean PG, Courage ML. The Economics of Pediatric Eye/Vision Screening: Calculating the Cost-Effectiveness of a Large-Scale Preschool Vision Screening Program. *Invest Ophthalmol Vis Sci* 2007;48:4835.
- (2) Agoumi Y, Kamdeu Fansi A, Harasymowycz P. Validity of Screening for Glaucomatous Optic Nerve Damage Using Confocal Scanning Laser Ophthalmoscopy (Heidelberg Retina Tomograph III) in High-Risk Populations. *Invest Ophthalmol Vis Sci* 2007;48:3321.
- (3) Anderson W, Gregori G, Budenz DL. Total Retinal Thickness Defects on Spectral Domain Optical Coherence Tomography Are Correlated With Glaucomatous Visual Field Abnormalities. *Invest Ophthalmol Vis Sci* 2007;48:496.
- (4) Aung T, Lavanya R, Sakata LM et al. Screening for Angle Closure in the Singapore Population: Evaluation of 3 New Non-Contact Devices. *Invest Ophthalmol Vis Sci* 2007;48:866.
- (5) Balasubramanian M, Bowd C, Wolenski P et al. Evaluation of a Novel Proper Orthogonal Decomposition (POD) Framework for Detecting Glaucomatous Changes in Human Subjects. *Invest Ophthalmol Vis Sci* 2007;48:3331.
- (6) Barak V, Frenkel S, Kalickman I, Hendler K, Folberg R, Pe'er J. TPS - A Potential Blood Marker for Detecting Metastatic Uveal Melanoma. *Invest Ophthalmol Vis Sci* 2007;48:1947.
- (7) Bayer AU, Dunker S, Sebag J, German Eye Disease Study G. German Eye Disease Study: Outcomes Research in the Diagnosis and Management of Glaucoma. *Invest Ophthalmol Vis Sci* 2007;48:855.
- (8) Bizios D, Bengtsson B, Hougaard JL, Heijl A. Processing of Optical Coherence Tomography (OCT) Data for Glaucoma Detection With Machine Learning Classifiers. *Invest Ophthalmol Vis Sci* 2007;48:525.
- (9) Block SS, Needham A, Peterson S. Comparison of Results of the Randot Stereo Smile Test II to the Random Dot "E" Test of Stereopsis in a Screening Setting. *Invest Ophthalmol Vis Sci* 2007;48:5533.
- (10) Buchanan CR, Trucco E, England G, Cairns D, Mazo C. Automated Detection of Hyperfluorescent Leakage in Fluorescein Angiograms. *Invest Ophthalmol Vis Sci* 2007;48:2757.
- (11) Chalam K, Syed F, Siffert J, Syed S, Grover S. Evaluation of Modified Portable Digital Camera as Screening Tool in Retinal Disorders. *Invest Ophthalmol Vis Sci* 2007;48:2577.
- (12) Chen HY, Huang ML, Hung PT. Artificial Neural Network for Glaucoma Diagnosis Using Scanning Laser Polarimetry-Variable Cornea Compensation Measurements in Taiwan Chinese Population. *Invest Ophthalmol Vis Sci* 2007;48:500.
- (13) Cheng H, Laron M, Schiffman JS et al. Assessing Visual Pathway Function in Multiple Sclerosis (MS) Patients Using Multifocal Visual Evoked Potential (mfVEP) Technique. *Invest Ophthalmol Vis Sci* 2007;48:3765.
- (14) Covert DJ, Mancini R, Mantravadi AV. The Relationship Between Diabetic Patients' Subjective Estimates of Daily Capillary Blood Glucose and Objective Measures Including Hemoglobin A1C, Insulin Use, Type of Diabetes and Presence of Diabetic Retinopathy. *Invest Ophthalmol Vis Sci* 2007;48:168.
- (15) Cronin TH, Thompson PP, Kowalski RP. Clinical Correlations of Herpes Simplex Culture Results: When PCR and Standard Viral Culture Results Don't Match. *Invest Ophthalmol Vis Sci* 2007;48:3798.
- (16) Demirel S, Fortune B, Zhang X et al. Effect of Recording Duration on Diagnostic Performance of Multifocal Visual Evoked Potentials in High-Risk Ocular Hypertension and Early Glaucoma. *Invest Ophthalmol Vis Sci* 2007;48:4453.
- (17) Di Matteo F, Guareschi M, Riva I et al. Clinical Ability of HRT III and Stratus OCT Optic Nerve Head Algorithms in Detecting Glaucomatous Visual Field Defects. *Invest Ophthalmol Vis Sci* 2007;48:526.
- (18) Felcida V, Jain AK, Gupta A, Pilli S. Evaluation of Impression Smear in Diagnosing Fungal Keratitis. *Invest Ophthalmol Vis Sci* 2007;48:2685.
- (19) Frazier M, Fuhr PSW, Marsh-Tootle WL. Evaluation of a Pilot Project to Screen Children's Vision in Nicaragua. *Invest Ophthalmol Vis Sci* 2007;48:4836.
- (20) Freitas D, Barbosa J, Regatieri C et al. Adenovirus Conjunctivitis Diagnosis Using RPS Adenodetector(R). *Invest Ophthalmol Vis Sci* 2007;48:392.

- (21) Gelman R, Jiang L, Du YE, Martinez-Perez ME, Flynn JT, Chiang MF. Plus Disease in Retinopathy of Prematurity: Comparison of Computer-Based and Expert Diagnosis. *Invest Ophthalmol Vis Sci* 2007;48:3100.
- (22) Goldbaum MH, Kozak I, Hao J et al. Machine Learning Classifiers Can Detect Subtle Field Defects in Eyes of HIV Subjects. *Invest Ophthalmol Vis Sci* 2007;48:704.
- (23) Graham AD, Lundgrin E, Lin MC. Comparison of Categorical and Continuous Scale Questionnaires in the Identification of Dry-Eye Contact Lens Wearers. *Invest Ophthalmol Vis Sci* 2007;48:411.
- (24) Grus FH, Storf J, Wuenschig D, Joachim SC, Pfeiffer N. Analysis of Antibody Patterns in Glaucoma Patients by Means of Protein Micro-Arrays. *Invest Ophthalmol Vis Sci* 2007;48:5616.
- (25) Gu J, Zhan X, Crabb JS et al. Oxidative Modifications as Biomarkers for AMD. *Invest Ophthalmol Vis Sci* 2007;48:34.
- (26) Gunvant P, Toth M, Chang F, Haine CL, Hollo G. Diagnostic Accuracy of Polarimetry Images With Atypical Retardance Pattern in Diagnosing Glaucoma. *Invest Ophthalmol Vis Sci* 2007;48:502.
- (27) Gutstein W, Sinclair SH. Ocular Abnormalities Observed During a Screening of Trisomy Downs Athletes. *Invest Ophthalmol Vis Sci* 2007;48:4854.
- (28) Hoffmann EM, Munkwitz S, Pfeiffer N, Woltmann A, Grus FH. Fourier Analysis of Ocular Pulse Amplitude Measurements in Glaucoma Patients and Healthy Subjects. *Invest Ophthalmol Vis Sci* 2007;48:1253.
- (29) Horn FK, Adler W, Laemmer R, Michelson G, Juenemann AG, Lausen B. Glaucoma Detection With FDT-Screening and HRT-Measurements Using Classification Algorithms in Training and Test Populations. *Invest Ophthalmol Vis Sci* 2007;48:1633.
- (30) Irkec MT, Turkish OSG. Reliability and Validity of Turkish Translation of the Ocular Surface Disease Index (OSDI) in Dry Eye Syndrome. *Invest Ophthalmol Vis Sci* 2007;48:408.
- (31) Jain S, Shah NN, Bowd C et al. Combining Structural and Functional Tests for Glaucoma Diagnosis via Nonparametric Bayesian Mixture Modeling. *Invest Ophthalmol Vis Sci* 2007;48:495.
- (32) James AC, Goh XL, Maddess T. Multifocal Dichoptic Pupillography in Glaucoma. *Invest Ophthalmol Vis Sci* 2007;48:1629.
- (33) Karcioglu ZA, Haik BG. Comparison of Cytopathologic and Histopathologic Diagnoses in Orbital Mass Lesions. *Invest Ophthalmol Vis Sci* 2007;48:3581.
- (34) Khanifar AA, Cousins SW. Comparison of Optical Coherence Tomography With Heidelberg Retinal Tomography Retinal Thickness Maps in the Detection of Macular Thickening in Diabetic Retinopathy and Age-Related Macular Degeneration. *Invest Ophthalmol Vis Sci* 2007;48:2602.
- (35) Kim D, Lee M, Jeoung J, Hwang SS, Park K, Kim T. Relationship Between Localized Retinal Nerve Fiber Layer Defects and Visual Field Abnormalities by Humphrey Matrix Frequency Doubling Technology Perimetry. *Invest Ophthalmol Vis Sci* 2007;48:1634.
- (36) Lee N, Laine A, Smith R, Barbazetto I, Busuico M. Retinal Vessel Segmentation Using Multi-Scale Wavelet Frame Analysis. *Invest Ophthalmol Vis Sci* 2007;48:2756.
- (37) Lisboa RD, Melo LAS, Fasolo LR et al. Comparison of Moorfields Regression Analysis and Glaucoma Probability Score Using Heidelberg Retina Tomograph in Glaucoma and Healthy Subjects. *Invest Ophthalmol Vis Sci* 2007;48:3318.
- (38) Lu AT, Chopra V, Tan O, Schuman JS, Huang D, Advanced I. Magnification Correction in the Diagnosis of Glaucoma With Optical Coherence Tomography. *Invest Ophthalmol Vis Sci* 2007;48:508.
- (39) Maddess TL, James AC. Pupillographic Multifocal Visual Field Assessment for Glaucoma. *Invest Ophthalmol Vis Sci* 2007;48:1630.
- (40) Mai T, Reus NJ, Lemij HG. Diagnostic Accuracy of Scanning Laser Polarimetry With Enhanced versus Variable Corneal Compensation. *Invest Ophthalmol Vis Sci* 2007;48:501.
- (41) Mansberger SL, Nguyen H, Torres R et al. Patterns of Optic Disc Change in Early Glaucoma and Glaucoma Suspect Patients. *Invest Ophthalmol Vis Sci* 2007;48:3338.
- (42) Mendez-Hernandez C, Garcia-Feijoo J, Fernandez-Vidal A et al. Diagnostic Results of Pulsar, Fdt and Flicker Perimetries in Patients With Ocular Hypertension. *Invest Ophthalmol Vis Sci* 2007;48:1631.
- (43) Monteiro ML, Moura FC. Comparison of the GDx VCC Scanning Laser Polarimeter and the Stratus OCT Optical Coherence Tomograph in the Detection of Band Atrophy of the Optic Nerve. *Invest Ophthalmol Vis Sci* 2007;48:2467.
- (44) Moura FC, Medeiros FA, Monteiro MLR. Evaluation of Retinal Nerve Fiber Layer Measurements Using Scanning Laser Polarimeter With Variable Corneal Compensation (GDx VCC) and Enhanced Corneal Compensation (GDx ECC) in the Eyes With Band Atrophy of the Optic Nerve. *Invest Ophthalmol Vis Sci* 2007;48:2466.

- (45) Nakatani Y, Ohkubo S, Higashide T, Iwase A, Kani K, Sugiyama K. Detection of Visual Field Defects Using Fundus-Oriented Small Target Perimetry in Preperimetric Glaucoma. *Invest Ophthalmol Vis Sci* 2007;48:1609.
- (46) Neelam K, Muldrew A, Hogg R, Maddock LA, Chakravarthy U, Beatty S. Grading of Age-Related Maculopathy: Slit-Lamp Biomicroscopy versus an Accredited Grading Centre. *Invest Ophthalmol Vis Sci* 2007;48:2173.
- (47) O'Leary N, Crabb DP, Schlottmann PG, Garway-Heath DF. A Statistical Method for Detecting Change in Series of Stratus OCTTM Measurements. *Invest Ophthalmol Vis Sci* 2007;48:3335.
- (48) Ohkubo S, Takeda H, Higashide T, Sasaki T, Sugiyama K. A Pilot Study to Detect Glaucoma with Confocal Scanning Laser Ophthalmoscopy Compared to Nonmydriatic Stereoscopic Photography in a Community Health Screening. *Invest Ophthalmol Vis Sci* 2007;48:3310.
- (49) Ohn YH, Park S, Park T. The Role of Electroretinographic Responses in Assessing the Progress of Diabetic Retinopathy. *Invest Ophthalmol Vis Sci* 2007;48:2896.
- (50) Patel N, Jones S, Sherwood R, Stamford M, Larkin G. Sarcoidosis: The Role of Ace Gene Polymorphisms in Increasing Sensitivity of Disease Detection. *Invest Ophthalmol Vis Sci* 2007;48:3900.
- (51) Phillips WW, Gupta S, Chalam SK, Grover S. Evaluation of Modified Retinopathy of Prematurity (ROP) Using Birth-Weight (BW) as Sole Inclusion Criteria. *Invest Ophthalmol Vis Sci* 2007;48:4061.
- (52) Rabin JC, Ivan D, Gooch J, Rubin R, Linnemeyer S, Foxworth M. Beyond 20/20: New Metrics for Quantifying Subnormal and Supernormal Vision. *Invest Ophthalmol Vis Sci* 2007;48:5516.
- (53) Reddy SC, Xing D, Arthur S et al. HRT III Glaucoma Probability Score (GPS) and Moorfields Regression Analysis (MRA) in Eyes With Glaucomatous Visual Field Loss. *Invest Ophthalmol Vis Sci* 2007;48:3323.
- (54) Reiser BJ, Schallhorn J, Tang M, Li Y, Huang D. Measuring the Anterior Corneal Vault Using the Visante Anterior Segment OCT: A Novel Diagnostic Tool for Keratoconus. *Invest Ophthalmol Vis Sci* 2007;48:1851.
- (55) Reus NJ, Lemij HG, European Optic Disc Assessment Trial g. Assessment of Stereoscopic Optic Disc Photographs in Glaucoma by European Ophthalmologists. *Invest Ophthalmol Vis Sci* 2007;48:1970.
- (56) Rossetti L, Oddone F, Centofanti M, Iester M, Fogagnolo P, Capris E. Discrimination Between Normal and Glaucomatous Eyes With the Heidelberg Retina Tomograph (HRT-3) Parameters and Classification Systems. *Invest Ophthalmol Vis Sci* 2007;48:3322.
- (57) Saito H, Tomidokoro A, Tomita G et al. Sensitivity and Specificity of the Glaucoma Probability Score in Heidelberg Retina Tomograph II in Japanese Eyes. *Invest Ophthalmol Vis Sci* 2007;48:3320.
- (58) Sandler SF, Dorairaj S, Tello C, Ritch R, Liebmann JM. Provocative Testing in the Era of Imaging: Slit-Lamp Adapted Optical Coherence Tomography (SL-OCT) vs. Ultrasound Biomicroscopy (UBM). *Invest Ophthalmol Vis Sci* 2007;48:873.
- (59) Siamak NM, Kowalski RP, Thompson PP, Romanowski EG, Shanks RMQ, Gordon YJ. Evaluation of the RPS Adeno Detector for Detecting Adenovirus From Ocular Specimens in the Laboratory Setting. *Invest Ophthalmol Vis Sci* 2007;48:4731.
- (60) Smith SD, Lowder CY, Moura Brasil OF, Margolis R, Kaiser PK. Chest Computerized Tomography in the Evaluation of Chronic Uveitis of Unknown Etiology. *Invest Ophthalmol Vis Sci* 2007;48:4404.
- (61) Smolek MK, Hovis JK. Comparison of Traditional Scoring and Neural Network Analysis of Farnsworth-Munsell 100 Hue Test Data. *Invest Ophthalmol Vis Sci* 2007;48:3812.
- (62) Tan O, Chopra V, Lu AT, Varma R, Huang D. Glaucoma Diagnosis by Mapping the Macula With Fourier Domain Optical Coherence Tomography. *Invest Ophthalmol Vis Sci* 2007;48:512.
- (63) Thiadens A, van Lith-Verhoeven J, Bernaerts R, Polling J, Simonsz H, Klaver C. Which Color Vision Test Should Be Used in Progressive Cone Dystrophy? *Invest Ophthalmol Vis Sci* 2007;48:3696.
- (64) Tomlinson A, Khanal S, McFadyen A, Diaper C, Ramaesh K. Determination of the Most Effective Tests in Differentiating Chronic Blepharitis From Dry Eye. *Invest Ophthalmol Vis Sci* 2007;48:412.
- (65) Tonini M. Specific PCR for Candida and Aspergillus Fumigatus for the Etiological Diagnosis of Endophthalmitis. *Invest Ophthalmol Vis Sci* 2007;48:690.
- (66) Townsend KA, Wollstein G, Danks D et al. Heidelberg Retina Tomography 3 Machine Learning Classifiers for Glaucoma Detection. *Invest Ophthalmol Vis Sci* 2007;48:3317.
- (67) Tu EY, Joslin CE, Shoff ME, Booton GC. Differential Rates of Isolation From Two Laboratories During an Ongoing Outbreak of Acanthamoeba Keratitis. *Invest Ophthalmol Vis Sci* 2007;48:753.
- (68) Uchida H, Saito H, Iwase A et al. Improvement of Glaucoma Diagnosis With Heidelberg Retina Tomography (HRT) in Japanese Myopic Eyes. *Invest Ophthalmol Vis Sci* 2007;48:3316.
- (69) Villegas-Perez MP, Calzado-Hinojosa J, Ortiz-Gomariz A, Miralles de Imperial J. Overtreatment of Glaucoma: The Murcia Study. *Invest Ophthalmol Vis Sci* 2007;48:5585.

- (70) Wen AE, Black EH, Kim C. Reliability of Computed Tomography in the Diagnosis of Open-Globe Injuries. *Invest Ophthalmol Vis Sci* 2007;48:5484.
- (71) Wenick AS, Rodarte C, Yang EB et al. Latencies of the Multifocal Visual Evoked Potential and the Diagnosis of Optic Neuritis and Ischemic Optic Neuropathy. *Invest Ophthalmol Vis Sci* 2007;48:917.
- (72) Wong WT, Wilkinson CP, Agron E et al. Comparison of Dilated Clinical Fundus Exam Using the International Clinical Diabetic Retinopathy Severity (ICDRS) Scale With Standard Stereoscopic Seven-Field Photography Using the Early Treatment Diabetic Retinopathy Study (ETDRS) Scale. *Invest Ophthalmol Vis Sci* 2007;48:1401.
- (73) Wroblewski D, Francis BA, Chopra V, Quiros P, Massengill RK. Numerical Modeling of Visual Field Test Data for Glaucoma Detection and Evaluation. *Invest Ophthalmol Vis Sci* 2007;48:1642.
- (74) Xu J, Ishikawa H, Wollstein G et al. Automated Extraction of Optic Nerve Head Parameters From Stereoscopic Optic Nerve Head Photographs. *Invest Ophthalmol Vis Sci* 2007;48:3312.
- (75) Yildirim N, Sagdilek B, Ozer A, Yurdakul S. Correlation of Confocal Laser Scanning Tomography With Planimetric Photographic Measurements of the Optic Disc in Normal and Glaucomatous Eyes. *Invest Ophthalmol Vis Sci* 2007;48:3311.
- (76) Abramoff MD, Van Ginneken B, Suttorp MSA, Russell SR, Niemeijer M. Improved Computer Aided Detection of Diabetic Retinopathy Evaluated on 10,000 Screening Exams. *Invest Ophthalmol Vis Sci* 2008;49:2735.
- (77) Bagherinia H, Chen X, Flachenecker C et al. Support Vector Machine (SVM)-Based Classification of Corneal Topography. *Invest Ophthalmol Vis Sci* 2008;49:1023.
- (78) Bellios N, Horn FK, Laemmer R, Dehne K, Juenemann AGM. Quantitative Perimetry of the Peripheral Nasal Visual Field in Glaucoma. *Invest Ophthalmol Vis Sci* 2008;49:1079.
- (79) Block SS, Knapp LB, Khan SK, Liu L, Mobini P, Ranjbar P. Comparison of the Time Needed to Complete the Random Dot E and the Stereo Smile II in a Population of Persons With Intellectual Disability. *Invest Ophthalmol Vis Sci* 2008;49:2577.
- (80) Bock R, Meier J, Nyul LG, Hornegger J, Michelson G. Automated Glaucoma Detection From Color Fundus Photographs. *Invest Ophthalmol Vis Sci* 2008;49:1863.
- (81) Bohm N, Joachim SC, Haass W, Pfeiffer N, Grus FH. Protein Micro-Arrays as an Effective Method for Antibody Profiling in Glaucoma. *Invest Ophthalmol Vis Sci* 2008;49:1570.
- (82) Boland MV, Quigley HA, Danesh-Meyer H. Development and Evaluation of a Neurological Hemifield Test. *Invest Ophthalmol Vis Sci* 2008;49:1071.
- (83) Bourne RR, Newsom W, French K, Chang L. The CHANGES Scheme (Community and Hospital Allied Network Glaucoma Evaluation Scheme). *Invest Ophthalmol Vis Sci* 2008;49:4999.
- (84) Bowd C, Balasubramanian M, Vizzeri G et al. Sensitivity and Specificity of Heidelberg Retina Tomograph (HRT) Topographic Change Analysis (TCA) Parameters. *Invest Ophthalmol Vis Sci* 2008;49:3759.
- (85) Bykhovskaya I, Azen S, Torres M, Varma R. Optic Disc Hemorrhage in Latinos: The Los Angeles Latino Eye Study. *Invest Ophthalmol Vis Sci* 2008;49:5451.
- (86) Challa P, Schmidt S, Liu Y et al. LOXL1 Polymorphism Prevalence in a North Carolina Population With Exfoliation Glaucoma. *Invest Ophthalmol Vis Sci* 2008;49:5867.
- (87) Chan RV, Williams SL, Yonekawa Y, Wang L, Lee TC, Chiang MF. Accuracy of Retinopathy of Prematurity Diagnosis by Retinal Fellows Compared to Experts. *Invest Ophthalmol Vis Sci* 2008;49:1402.
- (88) Chang RT, Knight OJ, Ramulu P, Shi W, Feuer WJ, Budenz DL. Combining Frequency Doubling Technology and GDx to Screen for Glaucoma. *Invest Ophthalmol Vis Sci* 2008;49:742.
- (89) Chua J, Wong HT, Sakata L et al. Comparison of the Slit-Lamp Anterior Segment Optical Coherence Tomography and Scanning Peripheral Anterior Chamber Depth Analyzer in the Evaluation of Angle Closure in Asian Eyes. *Invest Ophthalmol Vis Sci* 2008;49:5088.
- (90) Ciobanu A, Fansi AK, Harasymowycz P. The Validity of Screening for Glaucomatous Optic Nerve Damage Using GDx Variable Cornea Compensation (VCC) Scanning Laser Polarimetry (SLP) With VCC in High Risk Populations. *Invest Ophthalmol Vis Sci* 2008;49:4643.
- (91) Crabb DP, Artes PH. New Methods for Estimating Normal Limits of Optic Disc Rim Area With the Heidelberg Retina Tomograph. *Invest Ophthalmol Vis Sci* 2008;49:3639.
- (92) Cunha LP, Oyamada MK, Monteiro MLR. Diagnostic Ability of Multifocal Pattern Electroretinograms to Detect Hemianopic Neural Loss in Band Atrophy of the Optic Nerve. *Invest Ophthalmol Vis Sci* 2008;49:5378.
- (93) Dave AJ, Gabrielian A, Lin R et al. A Comparison of Optical Coherence Tomography (OCT) and Fluorescein Angiography (FA) in The Diagnosis and Assessment of Diabetic Macular Edema. *Invest Ophthalmol Vis Sci* 2008;49:3479.

- (94) De Monchy I, Mariette X, Offret H, Labetoulle M. Phenol Red Thread Test: Optimisation of Diagnostic Strategy in Severe Ocular Sicca Syndrome. *Invest Ophthalmol Vis Sci* 2008;49:5328.
- (95) DelCourt C, Dartigues JF, Colin J et al. Use of a Simple Reading Test for the Detection of Case of Late Age-Related Maculopathy in Large Epidemiological Studies. *Invest Ophthalmol Vis Sci* 2008;49:599.
- (96) Denniss J, Henson DB, Echendu D, Artes PH. The Interpretation of Optic Disc Images for Glaucomatous Damage by Specialist Clinicians. *Invest Ophthalmol Vis Sci* 2008;49:3625.
- (97) Drover JR, Wyatt LM, Stager DR, Birch EE. The Teller Acuity Cards are Effective in Detecting Amblyopia. *Invest Ophthalmol Vis Sci* 2008;49:2833.
- (98) Erginay A, Walter T, Ordonez R et al. Computer Assisted Fundus Color Image Analysis for Diagnosis of Diabetic Retinopathy. *Invest Ophthalmol Vis Sci* 2008;49:2137.
- (99) Espirito Santo LC, Cariello AJ, Oliveira FC, Hosoume M, Freitas D. Comparative Study of Schirmer's I and Phenol Red Thread Tests. *Invest Ophthalmol Vis Sci* 2008;49:5327.
- (100) Evans KS, North RV, Purslow C. The Relationship Between Tear Ferning, Tear Film Stability and Ocular Comfort. *Invest Ophthalmol Vis Sci* 2008;49:4837.
- (101) Ferreras A, Fogagnolo P, Pajarin AB, Pablo LE, Pinilla I, Rossetti L. Diagnostic Ability of Optical Coherence Tomography to Detect Retinal Nerve Fiber Layer Defects in Patients With Suspected Glaucoma. *Invest Ophthalmol Vis Sci* 2008;49:4659.
- (102) Goldbaum MH, Falkenstein I, Bartsch DU et al. Relevance Vector Machine Analysis of Multifocal ERGs of Eyes in HIV-Positive Subjects Without Infectious Retinitis Shows Deficiencies Compared to Normal Eyes. *Invest Ophthalmol Vis Sci* 2008;49:947.
- (103) Hallahan KM, Sinha-Roy A, Ambrosio R, Salomao M, Dupps WJ. Evaluation of Standard and Derived Ocular Response Analyzer (ORA) Biomechanical Measures in Keratoconus. *Invest Ophthalmol Vis Sci* 2008;49:4350.
- (104) Hangai M, Sakamoto A, Mori S et al. Macular Retinal Nerve Fiber Layer Segmentation by 3-Dimensional Spectral Domain Optical Coherence Tomography in Glaucoma Diagnosis. *Invest Ophthalmol Vis Sci* 2008;49:4652.
- (105) Harper T, Miller D, Schiffman JC, Davis JL. Diagnostic PCR of Aqueous Humor and Vitreous Specimens in Viral Retinitis and Posterior Uveitis. *Invest Ophthalmol Vis Sci* 2008;49:3884.
- (106) Healey PR, Mitchell P, Blue Mountains Eye S. The Glaucoma Likelihood Score: A Population-Based Model for Glaucoma Screening. *Invest Ophthalmol Vis Sci* 2008;49:5054.
- (107) Heinzlmann S, Boehringer D, Auw-Hadrich C, Ness T. Relevance of Clinical Parameters for Diagnosis of Giant Cell Arteritis. *Invest Ophthalmol Vis Sci* 2008;49:817.
- (108) Hoesl LM, Mardin CY, Horn FK, Juenemann AGM, Laemmer R. Influence of Glaucomatous Damage and Optic Disc Size on Glaucoma Detection by Scanning Laser Tomography. *Invest Ophthalmol Vis Sci* 2008;49:3645.
- (109) Ibranke J, Friedman DS, Repka MX et al. Lack of Concordance Between Fixation Preference Testing and HOTV Optotype Visual Acuity in Preschool Children: The Baltimore Pediatric Eye Disease Study. *Invest Ophthalmol Vis Sci* 2008;49:1450.
- (110) Irkec MT, Bozkurt B, Arslan U. Diagnostic Accuracy of Heidelberg Retina Tomograph III Classifications in Turkish Primary Open-Angle Glaucoma Population. *Invest Ophthalmol Vis Sci* 2008;49:3629.
- (111) James AC, Maddess TL, Kolic M, Goh XL. Dichoptic Pupillographic Multifocal Visual Field Assessment for Glaucoma. *Invest Ophthalmol Vis Sci* 2008;49:1100.
- (112) Kaltwasser C, Kremers J, Juenemann A, Horn FK. Objective Perimetry for Glaucoma Detection With a Four-Channel mfVECP Measurement System and a Computer-Based Analytic Tool. *Invest Ophthalmol Vis Sci* 2008;49:724.
- (113) Kamdeu Fansi AA, Boisjoly H, Chagnon M, Harasymowycz PJ. Combining Rim Area to Disc Area Asymmetry Ratio (Radaar) and Moorfields Classification for HRT III - Based Diagnosis of Glaucoma. *Invest Ophthalmol Vis Sci* 2008;49:3599.
- (114) Kim J, Ahn P, Kang P et al. Whole-Body PET-CT in the Staging and Post Radiation Therapy Surveillance of Orbital Mucosa-Associated Lymphoid Tissue (MALT) Type Marginal Zone B-Cell Lymphoma. *Invest Ophthalmol Vis Sci* 2008;49:5683.
- (115) Kimura M, Takeda H, Ohkubo S et al. The Usefulness of Myopic Eye HRT Classification in Glaucoma Screening. *Invest Ophthalmol Vis Sci* 2008;49:3633.
- (116) Kollbaum PS, Pepose J, Qazi M et al. Detection of Corneal Irregularity With Automated Corneal Topography Indices. *Invest Ophthalmol Vis Sci* 2008;49:1030.
- (117) Kulp MT, Vision in Preschoolers Study G. Detection of Significant Refractive Error With SureSight Vision Screener and Retinomax Autorefractor. *Invest Ophthalmol Vis Sci* 2008;49:3132.

- (118) Lajoie A, Koreen S, Wang L et al. Retinopathy of Prematurity Management Using Single-Image vs. Multiple-Image Telemedicine Examinations. *Invest Ophthalmol Vis Sci* 2008;49:1389.
- (119) Lee R, Schewitz LP, Nicholson LB, Dayan CM, Dick AD. Application of a Flow Cytometric Assay to Predict an Individual Patient's Response to Glucocorticoid Therapy for Posterior Segment Intraocular Inflammation (Uveitis). *Invest Ophthalmol Vis Sci* 2008;49:3234.
- (120) Leone JF, Rose KA, Kifley A, Sharbini SH, Mitchell P, Sydney Childhood Eye S. Is Visual Acuity a Reliable Screening Method for Significant Refractive Errors in Adolescents? *Invest Ophthalmol Vis Sci* 2008;49:3134.
- (121) Lorenzo Carrero J, Perez Flores I. B-Scan Ultrasound to Screen for Retinal Tears in Acute Symptomatic Age-Related Posterior Vitreous Detachment. *Invest Ophthalmol Vis Sci* 2008;49:911.
- (122) Loudon SE, Rook CA, Nassif DS, Piskun NV, Hunter DG. The Pediatric Vision Screener: Detection of Strabismic and Anisometropic Amblyopia. *Invest Ophthalmol Vis Sci* 2008;49:2830.
- (123) Luiselli C, Bottoni F, Giani A, Cereda M, Luccarelli S, Staurengi G. Detection of Choroidal Neovascularization Activity Using Spectral-Domain Optical Coherence Tomography. *Invest Ophthalmol Vis Sci* 2008;49:2229.
- (124) Machida S, Toba Y, Ohtaki A, Gotoh Y, Kaneko M, Kurosaka D. Photopic Negative Response of Focal Electoretinogram in Glaucoma. *Invest Ophthalmol Vis Sci* 2008;49:6105.
- (125) Mackenzie PJ, Johnson CA, Gritz DC, Krishnadas SR, Mansberger SL. Predictive Value of Heidelberg Retinal Tomography and Frequency Doubling Technology Perimetry for Detecting Glaucoma in a Developing Country. *Invest Ophthalmol Vis Sci* 2008;49:743.
- (126) Maddess TL, James AC, Carle CF, Kolic M, Goh XL. Higher Resolution Pupillographic Multifocal Visual Field Assessment. *Invest Ophthalmol Vis Sci* 2008;49:1099.
- (127) Malik R, Schlottmann PG, Carter A, Hogg CR, Holder GE, Garway-Heath DF. The Pattern ERG and Photopic Negative Response of the Flash ERG For the Identification of Glaucomatous Optic Neuropathy. *Invest Ophthalmol Vis Sci* 2008;49:1554.
- (128) Martinez de la Casa JM, Medeiros FA, Vizzeri G, Bowd C, Zangwill L, Weinreb RN. Ability of the Stratus OCT to Detect Pre-Perimetric Glaucoma in a Prospective Longitudinal Study. *Invest Ophthalmol Vis Sci* 2008;49:4658.
- (129) McCann LC, Tomlinson A, Pearce EI. Tear and Meibomian Gland Function in Blepharitis. *Invest Ophthalmol Vis Sci* 2008;49:1542.
- (130) Medeiros FA, Zangwill LM, Ng D, Vizzeri G, Weinreb RN. Likelihood Ratios for Glaucoma Diagnosis Using Scanning Laser Polarimetry. *Invest Ophthalmol Vis Sci* 2008;49:5432.
- (131) Meinhardt B, Guthoff R, Kasper K, Geerling G. Sensitivity and Specificity of in vivo Confocal Microscopy to Detect Pseudoexfoliation Material on the Corneal Endothelium - A Pilot Study to Diagnose Pseudoexfoliation Syndrome. *Invest Ophthalmol Vis Sci* 2008;49:2814.
- (132) Merula RV, Cronemberger S, Diniz Filho A, Calixto N. Biometric Comparative Study Between Acute Primary Angle Closure and Primary Open Angle Glaucoma With Narrow Angle. *Invest Ophthalmol Vis Sci* 2008;49:5099.
- (133) Miani F, Tosoni C, Parisi L, Zeppieri M, Brusini P. Optic Disc Damage Staging System (ODDSS): Accuracy, Reproducibility, Reliability and Clinical Utility. *Invest Ophthalmol Vis Sci* 2008;49:3624.
- (134) Michelessi M, Oddone F, Centofanti M et al. Diagnostic Accuracy of Sectorial Analysis of Optic Nerve Head Morphology Using the Heidelberg Retinal Tomograph 3. *Invest Ophthalmol Vis Sci* 2008;49:3636.
- (135) Monhart M, Bebie H, Buerki E. Receiver Operating Characteristics of a Novel Method of Visual Field Trend Analysis. *Invest Ophthalmol Vis Sci* 2008;49:1154.
- (136) Monteiro ML, Cunha LP, Oyamada MK. Pattern Electoretinograms for the Detection of Neural Loss in Patients With Permanent Temporal Visual Field Defect From Chiasmal Compression. *Invest Ophthalmol Vis Sci* 2008;49:1198.
- (137) Moreno-Montanes J, Anton A, Garcia N, Fernandez-Hortelano A, Morilla A, Fallon M. Comparison of Retinal Nerve Fiber Layer Thickness Values Using Stratus-OCT and HRT-III. *Invest Ophthalmol Vis Sci* 2008;49:4627.
- (138) Mori S, Hangai M, Nakanishi H et al. Macular Inner and Total Retinal Volume Measurement by Spectral Domain Optical Coherence Tomography for Glaucoma Diagnosis. *Invest Ophthalmol Vis Sci* 2008;49:4651.
- (139) Morohoshi K, Patel N, Ohbayashi M, Chong V, Bird AC, Ono SJ. Identification of Autoantibody Biomarkers in Sera From Patients With Age-Related Macular Degeneration. *Invest Ophthalmol Vis Sci* 2008;49:5154.

- (140) Munoz Negrete FJ, Arnalich-Montiel F, Casas-Llera P, Rebolleda G. Performance of Glaucoma Progression Analysis (GPA) Software in a Glaucoma Population. *Invest Ophthalmol Vis Sci* 2008;49:1093.
- (141) Ng M, Racette L, Liebmann JM et al. A Comparison of Short-Wavelength Automated Perimetry Using the Swedish Interactive Threshold Algorithm (SWAP-SITA) to the Full-Threshold method (SWAP-FT) and Standard Automated Perimetry (SAP-SITA). *Invest Ophthalmol Vis Sci* 2008;49:1073.
- (142) Niemeijer M, Sonka M, Garvin MK, Van Ginneken B, Abramoff MD. Automated Segmentation of the Retinal Vasculature in 3D Optical Coherence Tomography Images. *Invest Ophthalmol Vis Sci* 2008;49:1832.
- (143) Noro T, Nakano T, Tatemichi M et al. Performance of the Humphrey Matrix 24-2-1 as a Screening Tool for Glaucoma. *Invest Ophthalmol Vis Sci* 2008;49:1097.
- (144) Nose A, Tomita G, Takagi ST, Kita Y. Glaucoma Diagnosis in Japanese Eyes by Heidelberg Retina Tomography Using Japanese Database. *Invest Ophthalmol Vis Sci* 2008;49:3631.
- (145) O'Leary N, Mansberger SL, Twa MD et al. Glaucomatous Progression in Series of Stereo-Paired Photographs and Heidelberg Retinal Tomography Images. *Invest Ophthalmol Vis Sci* 2008;49:5431.
- (146) Perdicchi A, Iester M, Capris E et al. Comparison Between Discriminant Analysis Models and "Glaucoma Probability Score" for the Detection of Glaucomatous Optic Nerve Head Changes. *Invest Ophthalmol Vis Sci* 2008;49:3637.
- (147) Plange N, Kaup M, Hirsch F, Arend KO, Remky A. Sensitivity of Imaging the Peripheral Nerve Fiber Layer Using a Confocal Scanning Laser Ophthalmoscope to Detect Glaucoma. *Invest Ophthalmol Vis Sci* 2008;49:4617.
- (148) Prakash M, Sun JK, Cavallerano JD et al. A Comparison of the Automated Retinal Imaging System (ARIS) and ETDRS Protocol Color Stereoscopic Retinal Photography in Lesion-Level Assessment of Diabetic Retinopathy. *Invest Ophthalmol Vis Sci* 2008;49:4229.
- (149) Pult H, Purslow C, Berry M, Murphy PJ. Clinical Signs of Discomfort in Contact Lens Wearers. *Invest Ophthalmol Vis Sci* 2008;49:4842.
- (150) Racette L, Tafreshi A, Liebmann JM et al. Visual Function Specific Perimetry to Identify Glaucomatous Visual Loss Using Three Different Definitions of Visual Field Abnormality. *Invest Ophthalmol Vis Sci* 2008;49:1157.
- (151) Ramos JB, Baikoff G, Li Y, Tang M, Huang D. Sensitivity of Keratoconus Screening With Optical Coherence Tomography. *Invest Ophthalmol Vis Sci* 2008;49:3273.
- (152) Reddy S, Auerbach M, Burgess B, Young TA. Positive Dual-Modality PET/CT Imaging of Primary Choroidal Melanoma is Associated With Monosomy 3. *Invest Ophthalmol Vis Sci* 2008;49:53.
- (153) Rossi A, Mosca M, Ratiglia R. HRT Glaucoma Probability Score and Moorfields Regression Analysis: Comparison of Diagnostic Accuracy. *Invest Ophthalmol Vis Sci* 2008;49:3638.
- (154) Saito H, Tomidokoro A, Tsutsumi T, Iwase A, Araie M, Tajimi Study G. Sensitivity and Specificity of the Heidelberg Retina Tomograph II Ver 3.0 in the Tajimi Study Population. *Invest Ophthalmol Vis Sci* 2008;49:3630.
- (155) Sakamoto A, Hangai M, Mori S et al. Wide Retinal Thickness Mapping Using Mosaic Three-Dimensional Spectral-Domain Optical Coherence Tomography for the Detection of Retinal Nerve Fiber Layer Damage in Glaucoma. *Invest Ophthalmol Vis Sci* 2008;49:4656.
- (156) Salim S, Fung KH, Smith ME, Aldridge A, Netland PA. Assessment of the Student Sight Savers Project (SSSP) Methods for Glaucoma Screening. *Invest Ophthalmol Vis Sci* 2008;49:5469.
- (157) Sandler SF, Radcliffe NM, Kay KY et al. Detection of Retinal Nerve Fiber Layer Defects by Optic Nerve Photography, Confocal Laser Polarimetry and Fourier-domain Optical Coherence Tomography. *Invest Ophthalmol Vis Sci* 2008;49:4646.
- (158) Schrems WA, Mardin CY, Horn FK, Juenemann AGM, Laemmer R. Comparison of Scanning Laser Polarimetry and Optical Coherence Tomography in Quantitative Retinal Nerve Fiber Assessment. *Invest Ophthalmol Vis Sci* 2008;49:4647.
- (159) Sheets CW, Grewal DS, Sehi M, Greenfield DS. Comparison of Time-Domain and Spectral-Domain Optical Coherence Tomography for Glaucoma Diagnosis. *Invest Ophthalmol Vis Sci* 2008;49:4657.
- (160) Shimamoto T, Yokoi N, Maruyama K, Komuro A, Nishii M, Kinoshita S. Applicability of a New Tear Stability Analysis System for the Screening of Dry Eye. *Invest Ophthalmol Vis Sci* 2008;49:5316.
- (161) Smolek MK, Vujosevic S, Piermarocchi S et al. An Expert System for Diabetic Retinopathy Screening With a Non-Mydriatic, Operator-Free Fundus Camera. *Invest Ophthalmol Vis Sci* 2008;49:2725.
- (162) Suzani M, Bertuzzi F, Angeli R et al. Assessment of Retinal Nerve Fiber Layer and Optic Disc With Oct, Slp And Cslo in Patients With Optic Neuritis. *Invest Ophthalmol Vis Sci* 2008;49:820.



- (163) Suzuki R, Vasconcelos-Moraes CG, Vessani RM, Reis A, Susanna R. Confocal Laser Ophthalmoscopy (HRT 3.0) Diagnostic Performance in Glaucomatous Eyes With Asymmetric Hemifield Defects. *Invest Ophthalmol Vis Sci* 2008;49:3635.
- (164) Tan O, Lu AT, Chopra V et al. Glaucoma Diagnosis by Mapping Peripapillary Nerve Fiber Layer Thickness With Fourier Domain Optical Coherence Tomography. *Invest Ophthalmol Vis Sci* 2008;49:4655.
- (165) Tobin KW, Chaum E, Abramoff MD, Govindasamy P, Karnowski TP. Automated Diagnosis of Retinal Disease in a Large Diabetic Population. *Invest Ophthalmol Vis Sci* 2008;49:3225.
- (166) Tomlinson A, Khanal S. Effectiveness of Tear Physiology Tests in the Differential Diagnosis of Dry Eye Subtypes. *Invest Ophthalmol Vis Sci* 2008;49:5852.
- (167) Toole AJ, Mitchell GL, Kulp MT, Earley MJ, Group CI-S. Discriminating Asymptomatic from Symptomatic Subjects Following Treatment for Convergence Insufficiency. *Invest Ophthalmol Vis Sci* 2008;49:1123.
- (168) Vandenbroeck S, Dobbels F, De Geest S, Stalmans I, Zeyen TG. Ophthalmologists Poorly Predict Patient Non-Adherence. *Invest Ophthalmol Vis Sci* 2008;49:1579.
- (169) Vass C, Resch H, Hirn C et al. Glaucoma Diagnosis Using Quantitative Analysis of Macular Raster Scanning HR-OCT. *Invest Ophthalmol Vis Sci* 2008;49:4653.
- (170) Vessani RM, Moritz R, Batis L, Zagui RB, Bernardoni S, Susanna R. Comparison of Quantitative Imaging Devices and Subjective Optic Nerve Head Assessment by General Ophthalmologists to Differentiate Normal From Glaucomatous Eyes. *Invest Ophthalmol Vis Sci* 2008;49:3628.
- (171) Wallace DK, Ahmad S, Freedman SF, Zhao Z. A Pilot Study Using "ROptool" to Analyze Video Indirect Ophthalmoscopy Images. *Invest Ophthalmol Vis Sci* 2008;49:1398.
- (172) Wang M, Lu A, Huang D, Advanced Imaging for Glaucoma Study G. Combining Information From Three Anatomic Regions in the Diagnosis of Glaucoma With Optical Coherence Tomography. *Invest Ophthalmol Vis Sci* 2008;49:3640.
- (173) Wang Y, Xu L, Jonas JB, Li J. Characteristics of Frequency Doubling Perimetry Testing in Glaucoma Diagnosis in a Population Base Study: The Beijing Eye Study. *Invest Ophthalmol Vis Sci* 2008;49:1096.
- (174) Williams SL, Wang L, Kane SA et al. Telemedical Diagnosis of Retinopathy of Prematurity: Accuracy of Expert vs. Nonexpert Graders. *Invest Ophthalmol Vis Sci* 2008;49:1397.
- (175) Xu L, Cao W, Chen C, Yang H, Jonas JB. Morphological Comparison Between Fellow Eyes of Acute Primary Angle Closure Glaucoma and Normal Eyes With Shallow Anterior Chamber Depth by Optical Coherence Tomography. *Invest Ophthalmol Vis Sci* 2008;49:3643.
- (176) Yang EB, Jin Jones Y, Alward WLM, Greenlee EC, Kwon YH, Abramoff MD. Comparing Resident and Fellow Performance on Evaluation of Stereoscopic Optic Disc Images. *Invest Ophthalmol Vis Sci* 2008;49:3626.
- (177) Yeh JC, Lu A, Varma R, Huang D, Advanced Imaging for Glaucoma Study G. Comparing the Glaucoma Diagnostic Accuracy of OCT, GDx, and HRT II Using Best Composite Scores. *Invest Ophthalmol Vis Sci* 2008;49:3641.
- (178) Abedi G, Patel P, Daly MK, Subramanian ML. Sensitivity and Specificity of Scotoma Detection by Preferential Hyperacuity Perimeter versus Amsler Grid in Various Macular Pathologies. *Invest Ophthalmol Vis Sci* 2009;50:942.
- (179) Abramoff MD, Russell SR, Mahajan V, Van Ginneken B, Niemeijer M. Performance of Automated Detection of Diabetic Retinopathy Does Not Improve by Using the Distance of Each Lesion to the Fovea. *Invest Ophthalmol Vis Sci* 2009;50:3268.
- (180) Alfonso EC, Miller D, Lawes P, Smith N, Diaz M, Perez E. Screening Efficacy of the RPS Adeno Detector System to Confirm Sporadic and Employee Adenoviral Conjunctivitis. *Invest Ophthalmol Vis Sci* 2009;50:5123.
- (181) Anselmi G, Marangoni D, Gari M et al. Relationship of Steady-State Pattern Electroretinogram With Standard Automated Perimetry in Glaucoma: Diffuse and Localised Visual Field Defects. *Invest Ophthalmol Vis Sci* 2009;50:5299.
- (182) Arakaki Y, Kashiwagi K, Nakamura Y et al. Screening for Occludable Angles in Southern Part of Japan: Evaluation of Scanning Peripheral Anterior Chamber Depth Analyzer. *Invest Ophthalmol Vis Sci* 2009;50:2461.
- (183) Bali SJ, Dada T, Sharma A, Sihota R, Panda A. Comparison of Diagnostic Ability of Moorfields Regression Analysis and Glaucoma Probability Score using HRT 3. *Invest Ophthalmol Vis Sci* 2009;50:5814.
- (184) Bautista VM, Castro-Mondragon JA, Gonzalez Y, Perez-Cano HJ, Santacruz-Valdes C, Mejia Lopez H. Real Time PCR for Herpes Virus Detection in Corneal Donors and Recipients. *Invest Ophthalmol Vis Sci* 2009;50:5941.

- (185) Bell A, James AC, Kolic M, Maddess T. Perimetry From Pupillography: Dichoptic Multifocal Stimuli Can Distinguish Subjects With Early-Stage Type 2 Diabetes. *Invest Ophthalmol Vis Sci* 2009;50:1332.
- (186) Blasi MA, Savino G, Balia L et al. A New Diagnostic Approach to Orbital Lymphoproliferative Disease. *Invest Ophthalmol Vis Sci* 2009;50:5729.
- (187) Bock R, Meier J, Nyul LG, Hornegger J, Michelson G. Multimodal Automated Glaucoma Detection Combining the Glaucoma Probability Score and the Glaucoma Risk Index. *Invest Ophthalmol Vis Sci* 2009;50:324.
- (188) Boehm N, Thiel U, Lossbrandt U, Pfeiffer N, Grus FH. Intraindividual Comparison of Antibody Patterns in Sera and Aqueous Humor of Glaucoma Patients and Healthy Subjects. *Invest Ophthalmol Vis Sci* 2009;50:2076.
- (189) Boland MV, Quigley HA. Evaluation of a Combined Index of Optic Nerve Structure, Function, and Anatomy to Detect Glaucoma. *Invest Ophthalmol Vis Sci* 2009;50:3513.
- (190) Budai A, Hornegger J, Michelson G. Multiscale Approach for Blood Vessel Segmentation on Retinal Fundus Images. *Invest Ophthalmol Vis Sci* 2009;50:325.
- (191) Chang RT, Knight OJ, Gendy MG, Mwanza JC, Feuer W, Budenz DL. Sensitivity and Specificity of Cirrus and Stratus OCT in Early and Moderate Perimetric Glaucoma. *Invest Ophthalmol Vis Sci* 2009;50:3340.
- (192) Chen J, Sun X, Wang M. Fourier-Domain Optical Coherence Tomography Measurement of Macular Ganglion Cell Complex and Peripapillary Nerve Fiber Layer Thickness in Normal and Glaucomatous Human Eyes. *Invest Ophthalmol Vis Sci* 2009;50:3324.
- (193) Cheung E, Jiminez A, Busuioc M, Smith RT. Fractal Analysis of Age Related Macular Degeneration. *Invest Ophthalmol Vis Sci* 2009;50:312.
- (194) Crabb JW, Ni J, Yuan X et al. Pentosidine and Carboxymethyllysine, Plasma Biomarkers for Age-Related Macular Degeneration. *Invest Ophthalmol Vis Sci* 2009;50:2330.
- (195) Ells AL, Hildebrand PL, Ingram AD. Accuracy of a Morphology-based Grading Protocol to Detect Referral Warranted Retinopathy of Prematurity. *Invest Ophthalmol Vis Sci* 2009;50:3147.
- (196) Fallon MA, Ayala E, Anton-Lopez A, Morilla A. Sensitivity and Specificity of Topographic Change Analysis (TCA) of HRT-III to Detect Progression. *Invest Ophthalmol Vis Sci* 2009;50:2247.
- (197) Genevois O, Flaud P, Benzerroug M et al. Arterio-venous Nicking and Dynamic Retinal Microvascular. *Invest Ophthalmol Vis Sci* 2009;50:5414.
- (198) Hagstrom SA, Gu J, Pauer GJT et al. Predicting Susceptibility to Age-Related Macular Degeneration With Genomic and Proteomic Biomarkers. *Invest Ophthalmol Vis Sci* 2009;50:2342.
- (199) Haines JL, Spencer KL, Agarwal A et al. Progress in Predicting Risk for Age-Related Macular Degeneration. *Invest Ophthalmol Vis Sci* 2009;50:1600.
- (200) Healey PR, Mitchell P. Confocal Scanning Laser Ophthalmoscopy in an Older Population. *Invest Ophthalmol Vis Sci* 2009;50:3083.
- (201) Hecker LA, Edwards AO, Ryu E et al. Systemic Complement Activation Increases the Risk of Developing AMD. *Invest Ophthalmol Vis Sci* 2009;50:3520.
- (202) Holland GN, Kim CJ, Van Natta ML et al. Immunologic and Virologic Laboratory Parameters Associated With Active AIDS-Related Cytomegalovirus Retinitis in the Era of Highly Active Antiretroviral Therapy. *Invest Ophthalmol Vis Sci* 2009;50:3596.
- (203) Horn FK, Baleanu D, Mardin CY, Juenemann AM, Tornow R. Combination of FDT-Perimetry and Nerve Fiber Layer Thickness Measurement With SOCT in Glaucoma Detection. *Invest Ophthalmol Vis Sci* 2009;50:4396.
- (204) Ibrahim O, Matsumoto Y, Sato E et al. The Efficacy, Sensitivity and Specificity of in vivo Laser Confocal Microscopy in the Diagnosis of Simple Meibomian Gland Disease (MGD). *Invest Ophthalmol Vis Sci* 2009;50:532.
- (205) Iester MM, Prato M, Vaccarezza V et al. A Linear Discriminant Function to Improve the Glaucoma Probability Score to Distinguish Healthy From Glaucomatous Optic Nerve Head. *Invest Ophthalmol Vis Sci* 2009;50:5811.
- (206) Ishikawa H, Bilonick RA, Wollstein G, Xu J, Kagemann L, Schuman JS. Macular Inner-Retinal Layer Thickness Super Pixel Analysis for Glaucoma Using Spectral Domain Optical Coherence Tomography (SD-OCT). *Invest Ophthalmol Vis Sci* 2009;50:3328.
- (207) James AC, Goh XL, Kolic M, Essex RW, Maddess T. Objective Pupillographic Multifocal Perimetry for Glaucoma. *Invest Ophthalmol Vis Sci* 2009;50:5282.
- (208) Jeoung J, Park K, Kim TW, Kim D. Comparison of the Cirrus Spectral Domain OCT and Stratus OCT to Detect Localized Retinal Nerve Fiber Layer Defects in Preperimetric Glaucoma. *Invest Ophthalmol Vis Sci* 2009;50:3339.

- (209) Johnson CA, Moore BD, Lyons S et al. The Massachusetts Kindergarten Vision Screening Study: Investigating the Suresight (SS) Autorefractor Alternative. *Invest Ophthalmol Vis Sci* 2009;50:1591.
- (210) Kamdeu Fansi AA, Li G, Harasymowycz PJ. Performance of Single-test Screening Mode Frequency Doubling Perimetry (fdt) in Glaucoma High-risk Populations. *Invest Ophthalmol Vis Sci* 2009;50:4079.
- (211) Khanifar AA, Rondeau MJ, Silverman RH, Lloyd HO, Chan RVP, Coleman DJ. Characterization of Dry and Wet Age-Related Macular Degeneration Using High-Resolution Ultrasound Wavelet Analysis of the Choroid. *Invest Ophthalmol Vis Sci* 2009;50:307.
- (212) Khondkaryan A, Keane PA, Liakopoulos S, Walsh AC, Sadda SR. Comparison of Optical Coherence Tomography and Fluorescein Angiography for the Classification of Neovascular Age-Related Macular Degeneration. *Invest Ophthalmol Vis Sci* 2009;50:5259.
- (213) Khor WB, Lavanya R, Sakata LM, Aung T. Evaluation of Scanning Protocols for Anterior Segment Optical Coherence Tomography Imaging of the Angle. *Invest Ophthalmol Vis Sci* 2009;50:3347.
- (214) Khouri AS, Fechtner RD, Liebmann JM. Three-Dimensional Optic Nerve Learning Module for Physicians in Training. *Invest Ophthalmol Vis Sci* 2009;50:5356.
- (215) Kiely AE, Wallace DK, Freedman SF, Zhao Z. Automated Combination of Tortuosity and Dilation Measures in Assessment of Retinopathy of Prematurity With "ROptool". *Invest Ophthalmol Vis Sci* 2009;50:5724.
- (216) Kim CY, Hong S, Seong G. Comparison of Peripapillary Retinal Nerve Fiber Layer Thickness Measured by Spectral vs. Time Domain Optical Coherence Tomography. *Invest Ophthalmol Vis Sci* 2009;50:1071.
- (217) Kim HJ, Chu D, Frohman L, Mirani N, Turbin RE. Comparison of Histologic Change in Lacrimal and Salivary Glands to <sup>67</sup>Ga-Citrate Scintigraphy and T1 Gadolinium Enhanced MRI Findings in Sarcoid Suspects. *Invest Ophthalmol Vis Sci* 2009;50:4033.
- (218) Kimberling WJ, Smith RJ, Drack AV et al. A Molecular Screening Test for Usher Syndrome. *Invest Ophthalmol Vis Sci* 2009;50:2308.
- (219) Kolic M, Maddess T, Essex RW, James AC. Attempting Balanced Multifocal Pupillographic Perimetry. *Invest Ophthalmol Vis Sci* 2009;50:5280.
- (220) Kovacs I, Mihaltz K, Takacs A, Kranitz K, Nagy ZZ. Evaluation of the Effect of Corneal Protrusion on Anterior Chamber Morphology in Keratoconic Patients Using Pentacam Scheimpflug Camera. *Invest Ophthalmol Vis Sci* 2009;50:3531.
- (221) Laemmer R, Tornow RP, Horn FK et al. Comparison of Diagnostic Accuracy Depending on Optic Disc Size in Early and Advanced Glaucoma Using Scanning Laser Tomography and Spectral Domain OCT. *Invest Ophthalmol Vis Sci* 2009;50:5812.
- (222) Lally DR, Wollstein G, Danks D et al. Combining OCT, HRT, and GDx Through Machine Learning Classifiers for Glaucoma Detection. *Invest Ophthalmol Vis Sci* 2009;50:5817.
- (223) Lamard M, Quéllev G, Cazuguel G, Roux C, Abramoff MD, Cochener B. Diabetic Retinopathy Screening Method Using Adapted Wavelets Decompositions and Template Matching. *Invest Ophthalmol Vis Sci* 2009;50:322.
- (224) Lederman M, Chowers I. C3 Polymorphism is Associated With Increased Risk for Age Related Macular Degeneration in the Israeli Population. *Invest Ophthalmol Vis Sci* 2009;50:1605.
- (225) Li G, Fansi AK, Boivin JF, Joseph L, Harasymowycz P. Screening for Glaucoma in High Risk Populations Using Optical Coherence Tomography (StratusOCT). *Invest Ophthalmol Vis Sci* 2009;50:3342.
- (226) Loewenstein A, Ferencz J, Lang Y et al. Multi-Center Study of a New Home AMD Perimeter, Based on Preferential Hyperacuity, for Early Detection of CNV. *Invest Ophthalmol Vis Sci* 2009;50:1660.
- (227) Machida S, Tamada K, Oikawa T, Yokoyama D, Kurosaka D. Diagnostic Ability of Photopic Negative Response of Full-Field and Focal Electoretinograms in Detecting Glaucomatous Eyes. *Invest Ophthalmol Vis Sci* 2009;50:6192.
- (228) Maddess TL, Kolic M, Essex RW, James AC. Balanced Luminance Multifocal Pupillographic Perimetry. *Invest Ophthalmol Vis Sci* 2009;50:5281.
- (229) Mahalakshmi B, Therese KL, Kirthika D et al. Evaluation of Nested PCR Targeting B1 gene With Four nPCRs (Targeting the B1, SAG2 and SAG1 Gene) for Detection of *Toxoplasma gondii* Genome in Intra Ocular Fluids From *Toxoplasma* Retinochoroiditis Patients in a Tertiary Eye Hospital, Chennai, India. *Invest Ophthalmol Vis Sci* 2009;50:857.
- (230) Maki JL, Marr BP, Abramson DH. Diagnosis of Retinoblastoma: How Good Are Referring Physicians in 2008? *Invest Ophthalmol Vis Sci* 2009;50:1682.
- (231) Mardin CY, Horn FK, Baleanu D et al. Influence of Retinal Blood Vessels on Diagnostic Accuracy of Rnfl Thickness Measurements Using Spectral-Domain Oct to Detect Glaucoma. *Invest Ophthalmol Vis Sci* 2009;50:3333.

- (232) Michelessi M, Oddone F, Centofanti M et al. Diagnostic Accuracy of Cirrus High Definition-OCT and GDx-VCC in Detecting Glaucoma. *Invest Ophthalmol Vis Sci* 2009;50:5818.
- (233) Mihaltz K, Kranitz K, Kovacs I, Nagy ZZ. Evaluation of Wavefront Aberrations in Patients With Keratoconus Measured With a Hartmann-Shack Sensor. *Invest Ophthalmol Vis Sci* 2009;50:3541.
- (234) Mones JM, Amselem L. Agreement of Preferential Hyperacuity Perimetry (PHP) With the Clinical Decision to Treat CNV Patients. *Invest Ophthalmol Vis Sci* 2009;50:954.
- (235) Moore BD, Johnson C, Lyons S et al. The Massachusetts Kindergarten Vision Screening Study (MKVSS): Comparing the SureSight to Vision in Preschoolers (VIP) Study Results. *Invest Ophthalmol Vis Sci* 2009;50:2440.
- (236) Moreno-Montanes J, Olmo N, Alvarez A, Garcia N, Zarranz-Ventura J. Cirrus High-Definition Optical Coherence Tomography Compared to Stratus Optical Coherence Tomography in Glaucoma Diagnosis. *Invest Ophthalmol Vis Sci* 2009;50:3343.
- (237) Narayanaswamy A, Sakata LM, He M et al. Diagnostic Performance of Anterior Chamber Angle Measurements in Detecting Eyes at Risk for Angle Closure - An Anterior Segment OCT Study. *Invest Ophthalmol Vis Sci* 2009;50:3352.
- (238) Neal BE, Balasubramanian M, Bowd C et al. Stereometric Parameter Trend-Analysis for Detecting Progression Using Three Heidelberg Retina Tomograph Reference Planes. *Invest Ophthalmol Vis Sci* 2009;50:2246.
- (239) Neubauer AS, Kernt M, Peters N, Dichgans M, Kampik A. Retinal Vessel Analysis in Cerebral Stroke Patients versus Normals. *Invest Ophthalmol Vis Sci* 2009;50:3307.
- (240) Neudorfer M, Siegman Ben-Chaim M, Stolovitch C, Dotan G, Kesler A. The Diagnostic Yield of Optic Nerve Ultrasonography for Differentiating Papilledema From Pseudopapilledema in Eyes With Swollen Optic Discs. *Invest Ophthalmol Vis Sci* 2009;50:4021.
- (241) Olivier MM, Washington JC. Glaucoma Screening in a Resident Clinic of High Risk Patient Referrals From Primary Care Physicians. *Invest Ophthalmol Vis Sci* 2009;50:2509.
- (242) Ong HS, Levin S, Ahmed F, Vafidis G. Is Glaucoma Screening Using National Diabetic Retinopathy Programme Images Effective? *Invest Ophthalmol Vis Sci* 2009;50:4090.
- (243) Ouyang Y, Keane P, Sadda S, Walsh A. Detection of Cystoid Macular Edema With 3D-OCT Versus Fluorescein Angiography. *Invest Ophthalmol Vis Sci* 2009;50:3283.
- (244) Pearce EI, Tomlinson A, McCann LC, Kaye SB, Fisher AC. A Clinical Alternative to Fluorophotometry for Measuring Tear Production in the Diagnosis of Dry Eye. *Invest Ophthalmol Vis Sci* 2009;50:4674.
- (245) Pekmezci M, Huang JY, Lin SC. Accuracy of the Ganglion Cell Layer Thickness Analysis in Predicting the Visual Field Defects. *Invest Ophthalmol Vis Sci* 2009;50:3327.
- (246) Pelegrin L, Adan A, Arostegui J et al. Cytokine Gen Polymorphisms Involved in Susceptibility and Severity of Oligoarticular Juvenile Idiopathic Arthritis (JIA)-Associated Uveitis. *Invest Ophthalmol Vis Sci* 2009;50:3747.
- (247) Perera SA, Baskaran M, Friedman DS, Tun TA, Htoon HM, Aung T. Evaluation of EyeCamTM for Angle Imaging in Asian Eyes. *Invest Ophthalmol Vis Sci* 2009;50:3354.
- (248) Qiu X, Gong L, Chen M. The Utilization of the Fourth Generation Fourier Domain Anterior Segment OCT in the Measurement of Tear Meniscus and the Diagnosis of Dry Eye. *Invest Ophthalmol Vis Sci* 2009;50:538.
- (249) Ramdas WD, Wolfs RCW, Hofman A, de Jong PTVM, Vingerling JR, Jansonius NM. Definition of Glaucomatous Optic Neuropathy for Epidemiological Studies Based on the Heidelberg Retina Tomograph (hrt3) - The Rotterdam Study. *Invest Ophthalmol Vis Sci* 2009;50:433.
- (250) Raskin A, Bordon AF, Gelminy A, Ferreira R, Moreno NP, Juricic EM. Comparison Between Ocular Coherence Tomography (OCT) and Fluorescein Angiography (FA) in Diabetic Patients. *Invest Ophthalmol Vis Sci* 2009;50:1342.
- (251) Romero IL, Ballalai PL, Barros JN, Silvino WR. The Use of 1% Toluidine Blue Eyedrops in the Diagnosis of Ocular Surface Squamous Neoplasia. *Invest Ophthalmol Vis Sci* 2009;50:5748.
- (252) Saarela V, Falck A, Airaksinen PJ, Tuulonen A. The Sensitivity and Specificity of Heidelberg Retina Tomograph Parameters to Glaucomatous Progression in Disc Photographs. *Invest Ophthalmol Vis Sci* 2009;50:2245.
- (253) Sabeti F, Maddess TL, Essex RW, James AC. Multifocal Pupillographic Perimetry in Unilateral Exudative Macular Degeneration. *Invest Ophthalmol Vis Sci* 2009;50:730.
- (254) Sakai H, Nakamura Y, Tomidokoro A et al. Ocular Biometry of Eyes With Occludable Angles in a Population-Based Study: Kumejima Study. *Invest Ophthalmol Vis Sci* 2009;50:415.
- (255) Sakata LM, Lavanya R, Aung HT, He M, Aung T. A New Classification System to Detect Eyes at Risk for Angle Closure With Anterior-Segment OCT. *Invest Ophthalmol Vis Sci* 2009;50:3353.

- (256) Saltzman RM, Whitson JT, Wax MB. Pneumatography in Normal Pressure Glaucoma. *Invest Ophthalmol Vis Sci* 2009;50:2850.
- (257) Sample PA, Jang G, Jung TP et al. Unsupervised Machine Learning With Independent Component Analysis Identifies Patterns of Glaucomatous Visual Field Loss in SITA Fields. *Invest Ophthalmol Vis Sci* 2009;50:5283.
- (258) Seong M, Sung K, Park S, Choi J, Kook M. Glaucoma Discrimination Capability of Macular Inner Retinal Layer Thickness Assessed by Spectral Domain Optical Coherence Tomography. *Invest Ophthalmol Vis Sci* 2009;50:3326.
- (259) Shirakashi M, Yaoeda K, Fukushima A, Abe H. Effect of Optic Disc Size on the Diagnostic Ability of the Heidelberg Retina Tomograph in Japanese Subjects. *Invest Ophthalmol Vis Sci* 2009;50:5813.
- (260) Shwe Tin A, Taylor D, Smith GT, Murdoch IE. Binocular Infrared Pupillometry in Detecting Relative Afferent Pupillary Defect in Patients with Primary Open Angle Glaucoma. *Invest Ophthalmol Vis Sci* 2009;50:2471.
- (261) Sinclair AJ, Viant MR, Wallace GR et al. NMR-Based Metabolomic Analysis of Cerebrospinal Fluid and Serum in Neuro-Ophthalmological and Neurological Diseases - A Diagnostic Tool? *Invest Ophthalmol Vis Sci* 2009;50:4036.
- (262) Sung K, Park S, Kim S, Kook MS. Comparison of Glaucoma Diagnostic Capabilities Assessed by Cirrus and Stratus Optical Coherence Tomography. *Invest Ophthalmol Vis Sci* 2009;50:3344.
- (263) Swanson WH, Malinovsky VE, Dul MW, Holopigian K. Optic Disc and Visual Field Abnormalities in Patients With Glaucoma: Comparable Sensitivity When Measures Are Equated for Specificity. *Invest Ophthalmol Vis Sci* 2009;50:3512.
- (264) Tafreshi A, Racette L, Sample PA et al. Diagnostic Accuracy of Pattern Electroretinogram and Commonly Used Psychophysical Tests in Eyes with Glaucomatous Optic Neuropathy. *Invest Ophthalmol Vis Sci* 2009;50:5301.
- (265) Tarabishy AB, Campbell JP, Misra-Hebert A, Seballos R, Lang R, Singh RP. Accuracy of Single Field Non-Mydriatic Fundus Photography for the Screening of Retinal Disease in a Primary Care Setting. *Invest Ophthalmol Vis Sci* 2009;50:3309.
- (266) Thyparampil PJ, Park Y, Martinez-Perez M, Flynn JT, Chiang MF. Plus Disease in Retinopathy of Prematurity (ROP): Quantitative Analysis of Vascular Change. *Invest Ophthalmol Vis Sci* 2009;50:5725.
- (267) Tomlinson A, McCann L, Pearce EI. Comparison of OcuSense and Clifton Nanolitre Osmometers. *Invest Ophthalmol Vis Sci* 2009;50:534.
- (268) Tornow RP, Baleanu D, Horn FK et al. Peripapillary RNFL Thickness Allows Better Discrimination of Glaucoma Patients From Normal Subjects Than Total Retinal Thickness. *Invest Ophthalmol Vis Sci* 2009;50:1095.
- (269) Trastman-Caruso E, Jindal AP, Jadico SK et al. Performance of the Disc Damage Likelihood Scale, OCT III, and HRT III in the Diagnosis of Open Angle Glaucoma. *Invest Ophthalmol Vis Sci* 2009;50:5816.
- (270) Ungaro N, Mora P, Ghirardini S et al. Discriminating Between Healthy Subjects and Patients with Pigment Dispersion Syndrome or Pigmentary Glaucoma by Ultrasound Biomicroscopy (UBM). *Invest Ophthalmol Vis Sci* 2009;50:3365.
- (271) Wahl J, Barleon L, Morfeld P et al. EDMAGS (Evonik-Degussa-Mainz-Glaucoma Study) III: Development of an Expert System for Glaucoma Screening in the German Chemical Industry. *Invest Ophthalmol Vis Sci* 2009;50:424.
- (272) Yang M, Amerasinghe N, He MG et al. Comparison of Anterior Segment Optical Coherence Tomography and Ultrasound Biomicroscopy in the Assessment of the Anterior Chamber Angle. *Invest Ophthalmol Vis Sci* 2009;50:4784.
- (273) Zheng Y, Wong T, Loon S et al. Diagnostic Ability of Heidelberg Retina Tomography to Detect Glaucoma in a Population-Based Survey: The Singapore Malay Eye Study (SiMES). *Invest Ophthalmol Vis Sci* 2009;50:426.
- (274) Agurto Rios C, Murray V, Barriga S, Pattichis MS, Bauman WC, Soliz P. Automatic Classification of Diabetic Retinopathy Photographs Using Am-Fm. *Invest Ophthalmol Vis Sci* 2010;51:1795.
- (275) Ahn ES, Lowder CY, Culver DA. The Use of Chest Computerized Tomography in the Evaluation of Uveitis. *Invest Ophthalmol Vis Sci* 2010;51:3778.
- (276) Ajtony C, Fustos R, Bernad Z, Biro Z, Mezosi E, Doczi T. Visual Recovery After Surgical Treatment of Chiasmal Compressive Optic Neuropathy. *Invest Ophthalmol Vis Sci* 2010;51:1447.
- (277) Alencar LM, Balasubramaniam M, Bowd C et al. Comparison of the GDx GPA and the HRT TCA for Detection of Glaucomatous Progression. *Invest Ophthalmol Vis Sci* 2010;51:4011.

- (278) Anand A, De Moraes CG, Liebmann JM, Ritch R, Tello C. Short-Duration Visual Evoked Potential as an Objective Tool for Screening Refractive Errors. *Invest Ophthalmol Vis Sci* 2010;51:3279.
- (279) Andersson S, Bizios D, Heijl A, Bengtsson BM. Glaucoma Detection With the Stratus and Cirrus OCT in a Population Based Sample. *Invest Ophthalmol Vis Sci* 2010;51:222.
- (280) Aung T, Zheng C, Ho CL et al. Novel Anterior Chamber Angle Measurements With High Definition Optical Coherence Tomography Using the Schwalbe's Line as the Landmark. *Invest Ophthalmol Vis Sci* 2010;51:3855.
- (281) Bach M, Preiser D, Poloschek CM. Comparison of Pattern-ERG (PERG) and Photopic Negative Response (PhNR) in Glaucoma Suggests Differential Damage Mechanisms. *Invest Ophthalmol Vis Sci* 2010;51:5793.
- (282) Baker KC, Chen YL, Shi L, Lewis JWL, Kugler L, Wang M. Does the Posterior Corneal Elevation Provide the First Indication of Keratoconus? *Invest Ophthalmol Vis Sci* 2010;51:4963.
- (283) Balasubramanian M, Bowd C, Kriegman DJ, Weinreb RN, Sample PA, Zangwill LM. Detecting Glaucomatous Changes Using Only One Optic Nerve Head Scan Per Exam. *Invest Ophthalmol Vis Sci* 2010;51:2723.
- (284) Baleanu D, Tornow RP, Horn FK, Laemmer R, Kruse FE, Mardin CY. Comparison of Retinal Nerve Fiber Layer Thickness Measurements and Diagnostic Accuracy Between Spectral Domain and Time Domain Optical Coherence Tomography. *Invest Ophthalmol Vis Sci* 2010;51:251.
- (285) Baranano AE, Keane PA, Walsh AC, Sadda SR. Impact of Scanning Density on Qualitative Assessments From Spectral Domain Optical Coherence Tomography in Neovascular Age-Related Macular Degeneration. *Invest Ophthalmol Vis Sci* 2010;51:2281.
- (286) Barleon L, Deters C, Hoffmann EM et al. EDMAGS (Evonik-Degussa-Mainz-Glaucoma-Study) IV: The Glaucoma Probability Score of the Heidelberg Retina Tomograph (HRT 3.0) as a Screening Unit for Glaucoma. *Invest Ophthalmol Vis Sci* 2010;51:2722.
- (287) Barriga E, Murray V, Agurto C, Pattichis M, Russell SR, Soliz P. Automatic Computer-Based Grading for Age-Related Maculopathy. *Invest Ophthalmol Vis Sci* 2010;51:1793.
- (288) Beck S, Boehm N, Schlich M, Pfirmann K, Pfeiffer N, Grus FH. Comparison of Anti-Ocular IgG and IgM Autoantibody Patterns in Glaucoma Patients. *Invest Ophthalmol Vis Sci* 2010;51:4817.
- (289) Beltran-Agullo L, Roca-Obis M, Ayala-Fuentes E, Morilla-Grasa A, Anton-Lopez A. Spectralis SD-OCT and Cirrus SD-OCT: RNFL Thickness Measurement Agreement and Diagnostic Performance in Glaucoma. *Invest Ophthalmol Vis Sci* 2010;51:230.
- (290) Benatti E, Verga F, Bochicchio S et al. Evaluation of Retinal Nerve Fiber Layer Thickness Measurements for Glaucoma Detection: Time Domain vs Spectral Domain Optical Coherence Tomography. *Invest Ophthalmol Vis Sci* 2010;51:247.
- (291) Bergin C, Sinapis D, Sinapis A et al. Perimetry Instrument Comparison Study: Comparing the 'Screening' Strategies of Three Perimetry Devices to Discriminate Between Healthy and 'Glaucomatous' Eyes (Interim Results). *Invest Ophthalmol Vis Sci* 2010;51:5508.
- (292) Borchman D, Foulks GN, Yappert MC. Changes in Human Meibum With Age and Meibomian Gland Dysfunction. *Invest Ophthalmol Vis Sci* 2010;51:3383.
- (293) Brown K, Sewell J, Travison T. Enhancement of Retinal Lesion Detection Using P200C Scanning Laser Ophthalmoscopy. *Invest Ophthalmol Vis Sci* 2010;51:2302.
- (294) Carneiro RC, Macedo EMS, Matayoshi S. Punch Biopsy: Effective Diagnostic Test for Detection of Periocular Malignancy ? *Invest Ophthalmol Vis Sci* 2010;51:3516.
- (295) Charalel RA, Lin H, Singh K. Glaucoma Screening Using Relative Afferent Pupillary Defect. *Invest Ophthalmol Vis Sci* 2010;51:183.
- (296) Chiquet C, Ball PM, Pernollet M et al. Usefulness of T-Spot TB in the First-Line Check-Up of Uveitis Patients. *Invest Ophthalmol Vis Sci* 2010;51:5857.
- (297) Costa VP, Vidotti VG, Resende GM et al. Sensitivity and Specificity of Machine Learning Classifiers and Spectral Domain OCT for the Diagnosis of Glaucoma. *Invest Ophthalmol Vis Sci* 2010;51:227.
- (298) Coupland SG, Al-Breiki D, Hurley B, Leonard BC, Brownstein J, Noei F. Sensitivity and Specificity of Functional Correlates in Diabetic Macular Edema. *Invest Ophthalmol Vis Sci* 2010;51:3257.
- (299) Di Matteo F, Miserocchi E, Modorati G, Colucci A, Berchicci L, Bandello F. Role of Systemic Investigations and Characteristic Ocular Signs for the Diagnosis of Ocular Sarcoidosis. *Invest Ophthalmol Vis Sci* 2010;51:3772.
- (300) Dimitrov PN, Vingrys AJ, Robman LD et al. Monitoring Progression of AMD Through Visual Function Loss. *Invest Ophthalmol Vis Sci* 2010;51:4522.
- (301) Domanico D, Perrotta E, Esposito M, Bianchi S, Moretti M, Vingolo EM. Relationship Between Retinal Thickness in Optical Coherence Tomography (OCT) and Fluorescein Angiography (FA) in Diabetic Patients. *Invest Ophthalmol Vis Sci* 2010;51:4675.

- (302) Echegaray S, Zamora G, Luo W, Kardon R, Morales J, Soliz P. Automated Classification of Papilledema Using Frisen Grading and OCT Measurements. *Invest Ophthalmol Vis Sci* 2010;51:1775.
- (303) Eid C, Li G, Fontaine O, Lawrence J, Harasymowycz PJ. Bayesian Estimation of the Performance of Frequency Doubling Perimetry (FDT), Confocal Scanning Laser Ophthalmoscopy (HRT) and GDx Variable Corneal Compensation (GDx-VCC) Scanning Laser Polarimetry for Glaucoma Screening in the Absence of a Gold Standard for Glaucoma Diagnosis. *Invest Ophthalmol Vis Sci* 2010;51:2738.
- (304) Fernandes DB, Moura FC, Pereira SA, Callegaro D, Marchiori PE, Monteiro MLR. Evaluation of Retinal Nerve Fiber Layer Thickness Measurements in Longitudinally Extensive Transverse Myelitis. *Invest Ophthalmol Vis Sci* 2010;51:652.
- (305) Ferreras A, Pajarin AB, Pablo LE et al. Logistic Regression Analysis for Glaucoma Diagnosis Using Spectral Domain Optical Coherence Tomography. *Invest Ophthalmol Vis Sci* 2010;51:225.
- (306) Fingeret M, Klein R, Sloane A, Canellos E. Selective Perimetry: Comparing Heidelberg Edge Perimetry and Frequency-Doubling Technology Perimetry in Detecting Glaucomatous Loss. *Invest Ophthalmol Vis Sci* 2010;51:5509.
- (307) Gangaputra S, Diabetic Retinopathy Clinical Research N. Comparison of Film and Digital Fundus Photographs in Assessing Diabetic Retinopathy. *Invest Ophthalmol Vis Sci* 2010;51:2278.
- (308) Garcia I, Etxebarria J, Soria J et al. Molecular Diagnosis of Limbal Deficiency by RT-PCR: Detection of Mucin MUC5AC Transcript in Corneal Epithelium. *Invest Ophthalmol Vis Sci* 2010;51:2381.
- (309) Gelman R, Martinez-Perez ME, Flynn JT, Chiang MF. Pilot Study of Machine-Learning Classifiers for Plus Disease Diagnosis in ROP. *Invest Ophthalmol Vis Sci* 2010;51:5926.
- (310) Gelman SK, Gelman R, Barnes AH et al. Quantitative Analysis of Standard Published Photograph for Plus Disease Using Arterial Tortuosity and Venous Diameter. *Invest Ophthalmol Vis Sci* 2010;51:5224.
- (311) Ghodasra DH, Thuangtong A, Karp K et al. Change in Retinal Vessel Width and Tortuosity in Eyes at Risk for Retinopathy of Prematurity. *Invest Ophthalmol Vis Sci* 2010;51:5925.
- (312) Giancardo L, Meriaudeau F, Karnowski TP, Tobin K, Li Y, Chaum E. An Algorithm for Automated Diagnosis of Clinically Significant Macular Edema in a Teleophthalmology Network. *Invest Ophthalmol Vis Sci* 2010;51:4657.
- (313) Gilbert RM, Isenberg J, Fernandes BF, Ndao M, Belfort RN, Burnier MN. Detecting Novel Biomarkers in Ocular Vogt-Koyanagi-Harada Syndrome Using SELDI-TOF-MS. *Invest Ophthalmol Vis Sci* 2010;51:4849.
- (314) Goncalves AC, Silva LN, Gebrim EMS, Monteiro MLR. Objective Quantification of Orbital Apex Crowding to Detect Dysthyroid Optic Neuropathy Using Multidetector Computed Tomography. *Invest Ophthalmol Vis Sci* 2010;51:3916.
- (315) Grus FH, Boehm N, Beck S, Schlich M, Lossbrandt U, Pfeiffer N. Autoantibody Profiles in Tear Fluid as a Diagnostic Tool in Glaucoma. *Invest Ophthalmol Vis Sci* 2010;51:6110.
- (316) Gundogan FC, Oz O, Demirkaya S, Sobaci G. Color Vision Testing versus Pattern Visual Evoked Potentials in Multiple Sclerosis. *Invest Ophthalmol Vis Sci* 2010;51:5471.
- (317) Heo H, Kim HG, Park SW. Comparison of Scanning Laser Polarimetry With Variable Corneal Compensation and Optical Coherence Tomography in Preperimetric Glaucoma. *Invest Ophthalmol Vis Sci* 2010;51:4896.
- (318) Hoesl LM, Tornow RP, Schrems WA et al. Influence of Typical Scan Score on Diagnostic Performance of Scanning Laser Polarimetry and Optical Coherence Tomography. *Invest Ophthalmol Vis Sci* 2010;51:241.
- (319) Holland GN, Manukian N, Kalyani PS et al. Development of Pattern Recognition Software for Automated Computer Detection of AIDS-Related Cytomegalovirus Retinitis on Digital Fundus Photographs. *Invest Ophthalmol Vis Sci* 2010;51:4852.
- (320) Horn FK, Mardin CY, Baleanu D et al. Analysis of Peripapillary Nerve Fiber Layer Thickness (Assessed by SOCT) With Automated Classification and Correction for Individual Optic Disk Locations. *Invest Ophthalmol Vis Sci* 2010;51:260.
- (321) Hougaard JL, Heijl A, Andersson S, Bizios D, Bengtsson B. Effects of Quality Differences in Spectral Domain OCT on Glaucoma Diagnostics. *Invest Ophthalmol Vis Sci* 2010;51:255.
- (322) Hubbard LD, Sun W, Cleary PA et al. Comparability of Digital vs. Film Grading of Diabetic Retinopathy Severity in DCCT/EDIC. *Invest Ophthalmol Vis Sci* 2010;51:4674.
- (323) Isenberg J, Belfort RN, Fernandes BF, Belfort R, Burnier MN, Ndao M. Eight Novel Serum Biomarkers for Ocular Toxoplasmosis by Mass Spectroscopy. *Invest Ophthalmol Vis Sci* 2010;51:2905.
- (324) Iskander D, Szczesna DH, Alonso-Caneiro D, Read SA, Collins MJ. Predicting Dry Eye With Noninvasive Techniques of Tear Film Surface Assessment. *Invest Ophthalmol Vis Sci* 2010;51:3370.

- (325) Jonnadula G, Senthil S, Addepalli UK, Rao HL, Garudadri CS. Diagnostic Accuracy of Macular Inner Retinal and Peripapillary Retinal Nerve Fiber Layer Measurements by RTVue Spectral Domain OCT in Early Glaucoma. *Invest Ophthalmol Vis Sci* 2010;51:218.
- (326) Kawai S, Shimizu S, Shinoda K, Suzuki Y, Mizota A. Sensitivity and Specificity of Spectral-Domain Optical Coherence Tomography. *Invest Ophthalmol Vis Sci* 2010;51:244.
- (327) Keller K, Boehm D, Grus FH. Proline-Rich Protein 4 is Elevated in Tear Fluid of Breast Cancer Patients. *Invest Ophthalmol Vis Sci* 2010;51:4871.
- (328) Kim J, Kim N, Lee E et al. Comparing the Ganglion Cell Complex and Retinal Nerve Fiber Layer Measurements by Fourier Domain Optical Coherence Tomography to Detect Glaucoma in High Myopia. *Invest Ophthalmol Vis Sci* 2010;51:237.
- (329) Kolic M, Maddess TL, Essex RW, James AC. Effect of Intra Ocular Lens Implants on Diagnostic Performance of Multifocal Objective Perimetry in Glaucoma. *Invest Ophthalmol Vis Sci* 2010;51:5513.
- (330) Konno B, Prata TS, Lima VC et al. Macular Ganglion Cell Complex versus Peripapillary Retinal Nerve Fiber Layer Analysis for Assessment of Early Glaucoma. *Invest Ophthalmol Vis Sci* 2010;51:2742.
- (331) Laude A, Lu CK, Tang TB et al. Boundary Detection of Optic Disc and Parapapillary Atrophy From Color Fundus Images Using Dual-Channel Color Morphology and Snakes. *Invest Ophthalmol Vis Sci* 2010;51:1800.
- (332) Lewis KT, Crowder K, Replogle W, Fratkin J. Risk Factors Predictive of a Positive Temporal Artery Biopsy. *Invest Ophthalmol Vis Sci* 2010;51:1457.
- (333) Lima BD, Perry JD, Lewis C. CT Scan Evidence of Optic Nerve Dysfunction in Patients with Thyroid Eye Disease. *Invest Ophthalmol Vis Sci* 2010;51:3917.
- (334) Liu YY, Chen M, Ishikawa H, Wollstein G, Schuman J, Rehg J. Automated Macular Pathology Diagnosis in Three-Dimensional (3D) Spectral Domain Optical Coherence Tomography (SD-OCT) Images. *Invest Ophthalmol Vis Sci* 2010;51:1772.
- (335) Lorenz K, Schlich M, Boehm N, Kramann C, Pfeiffer N, Grus F. Detection of Autoantibody Patterns in Sera of Patients with Pseudoexfoliation Syndrome, Pseudoexfoliation Glaucoma and Cataract (Control Group). *Invest Ophthalmol Vis Sci* 2010;51:6111.
- (336) Luce D. Methodology for Keratoconus Risk Indices Using Ocular Response Analyzer (ORA) Waveform Analysis. *Invest Ophthalmol Vis Sci* 2010;51:4983.
- (337) Machida S, Tamada K, Oikawa T, Yokoyama D, Kaneko M, Kurosaka D. Sensitivity and Specificity of Photopic Negative Response of Focal Electoretinogram to Discriminate Glaucomatous Eyes. *Invest Ophthalmol Vis Sci* 2010;51:3267.
- (338) Maddess T, Carle CF, Kolic M, Essex RW, James AC. Diagnostic Power and Reproducibility of Multifocal Pupillographic Perimetry in Glaucoma. *Invest Ophthalmol Vis Sci* 2010;51:5505.
- (339) Malik R, Schlottmann PG, Carter A et al. The Sensitivity of the Photopic Negative Response of the Flash ERG for the Detection of Glaucomatous Optic Neuropathy is Comparable to Global Visual Field Indices. *Invest Ophthalmol Vis Sci* 2010;51:4334.
- (340) Mani B, Perera SA, Tun TA, Aung T. Diagnostic Performance of Goniophotography and EyeCam for Angle Closure. *Invest Ophthalmol Vis Sci* 2010;51:5528.
- (341) Melo GB, Bispo PJM, Regatieri CVS, Yu MCZ, Pignatari ACC, Hofling-Lima AL. Incidence of Endophthalmitis After Cataract Surgery and the Use of Real-Time PCR for Its Diagnosis. *Invest Ophthalmol Vis Sci* 2010;51:6053.
- (342) Michael R, Mikielewicz M, Kotliar K, Barraquer RI. The Usability of the New Waveform Parameters From the Ocular Response Analyzer in the Characterization of Keratoconus. *Invest Ophthalmol Vis Sci* 2010;51:4984.
- (343) Michelessi M, Oddone F, Centofanti M et al. Ganglion Cell Complex Analysis With Fourier-Domain OCT: Reproducibility and Diagnostic Accuracy in Glaucoma. *Invest Ophthalmol Vis Sci* 2010;51:238.
- (344) Mishra A, Artes PH, Sharpe GP, Nicolela MT. Sensitivity of Spectralis OCT Circumpapillary Retinal Nerve Fibre Layer Thickness Measurements and Relationships With Visual Field Damage in Three Distinct Types of Morphological Disc Damage in Glaucoma. *Invest Ophthalmol Vis Sci* 2010;51:4915.
- (345) Moulin AP, Gaillard MC, Balmer A, Munier FL. Ultrasound Biomicroscopy Evaluation of Anterior Extension of Retinoblastomas : A Clinico-Pathological Study. *Invest Ophthalmol Vis Sci* 2010;51:2075.
- (346) Murakami Y, Silva R, Moshfeghi DM. Stanford University Network for Diagnosis of Retinopathy of Prematurity: Four-Year Experience With Telemedicine Screening. *Invest Ophthalmol Vis Sci* 2010;51:5923.
- (347) Mwanza JC, Oakley JD, Anderson DR, Budenz DL. Ability of Cirrus™ HD-OCT Optic Disc Measurements to Discriminate Between Normal and Glaucomatous Eyes. *Invest Ophthalmol Vis Sci* 2010;51:224.



- (348) Myung JS, Granet DB, Williams SL et al. Accuracy of Retinopathy of Prematurity Diagnosis by Pediatric Ophthalmology Fellows. *Invest Ophthalmol Vis Sci* 2010;51:5924.
- (349) Nallasamy N, Keila PS, Hamrah P, Dana R. Rapid Automatic Keratocyte Analysis From in vivo Confocal Microscopy of the Cornea. *Invest Ophthalmol Vis Sci* 2010;51:5664.
- (350) Oleszczuk JD, Bergin C, Schnyder C, Crabb D, Sharkawi E. Octopus Standard Automated Perimetry, Pulsar Perimetry, Moorfields Motion Displacement Test and Heidelberg Retinal Tomography in Glaucoma Detection - A Comparison of Diagnostic Accuracy. *Invest Ophthalmol Vis Sci* 2010;51:4911.
- (351) Ott DL, Buehren J, Klaproth OK, Schwarz R, Kohnen T. Analysis of Corneal Wavefront Aberrations for Differentiation Between Keratoconus, Pellucid Marginal Degeneration and Normal Eyes. *Invest Ophthalmol Vis Sci* 2010;51:4975.
- (352) Palaio H, Cristovao L, Faria de Abreu J. Automated "Disease/No Disease" Grading in a Screening Programme for Diabetic Retinopathy. *Invest Ophthalmol Vis Sci* 2010;51:5349.
- (353) Panganiban MN, Castro DE, Lee Y, Mattox C. RNFL Thickness and Central Angle of RNFL Thinning Measures Obtained From Cirrus HD-OCT: Their Correlation and Their Ability to Detect Glaucoma. *Invest Ophthalmol Vis Sci* 2010;51:249.
- (354) Patel N, Chowdhury HR, Leung R, Sivaprasad S. Sensitivity and Specificity of Time-Domain versus Spectral-Domain Optical Coherence Tomography in the Diagnosis of Diabetic Macular Edema. *Invest Ophthalmol Vis Sci* 2010;51:4390.
- (355) Patel S, Zarbin MA, Bhagat N. Diagnostic Value of Clinical Examination and Radiographic Imaging in Identification of Intraocular Foreign Bodies in Open Globe Traumatic Injuries. *Invest Ophthalmol Vis Sci* 2010;51:5667.
- (356) Pathai S, Gilbert C, Lawn SD, Deshpande A. Sensitivity and Specificity of Clinical Parameters and CD4 Count in Predicting HIV-Associated Eye Disease. *Invest Ophthalmol Vis Sci* 2010;51:4853.
- (357) Patty LE, Wu S, Torres M, Varma R, Group L. Validity of Self-Reported Diagnosis and Treatment Among Latinos in the Los Angeles Latino Eye Study. *Invest Ophthalmol Vis Sci* 2010;51:5358.
- (358) Perrotta E, De Marco U, Salvatore S, Di Crescenzo C, Vingolo EM. Imaging of Choroidal Nevus With Spectral Domain Optical Coherence Tomography. *Invest Ophthalmol Vis Sci* 2010;51:1015.
- (359) Prasad P, Tsui I, Heilweil G, Hubschman JP, Schwartz SD. Ischemic Index for the Quantification of Retinal Non-Perfusion in Branch Retinal Vein Occlusion. *Invest Ophthalmol Vis Sci* 2010;51:285.
- (360) Prata TS, Lima VC, Castro DPE et al. Influence of Optic Disc Size on the Diagnostic Performance of Macular Ganglion Cell Complex and Peripapillary Retinal Nerve Fiber Layer Analyses in Glaucoma. *Invest Ophthalmol Vis Sci* 2010;51:4924.
- (361) Rabin JC, Gooch J, Rubin R, Linnemeyer S, Foxworth M. Cone Specific Diagnosis of Normal and Abnormal Color Vision. *Invest Ophthalmol Vis Sci* 2010;51:6301.
- (362) Ramirez C, Acosta C, Palacio JM, Sanchez JG, Zuluaga LM, Bareno J. Effectiveness of Screening for Diabetic Retinopathy With Non-Mydriatic Camera in Latino Population. *Invest Ophthalmol Vis Sci* 2010;51:4679.
- (363) Rao HL, Zangwill LM, Weinreb RN et al. Effect of Disease Severity on the Diagnostic Accuracy of RTVue Spectral Domain OCT. *Invest Ophthalmol Vis Sci* 2010;51:2978.
- (364) Resch H, Resch-Wolfslehner C, Brelva B, Schmidt-Erfurth U, Schubert R, Vass C. Comparison of Macular Retinal Ganglion Cell Plus Inner Plexiform Layer Measurement of 16 Sectors Surrounding the Fovea Obtained With HR-OCT in Healthy Subjects and Glaucoma Patients. *Invest Ophthalmol Vis Sci* 2010;51:232.
- (365) Roberts KF, Kulkarni SV, Artes PH. Performance of the Ethnicity-Specific Moorfields Regression Analysis and Quantile Regression Analysis in the St Kitts Eye Study. *Invest Ophthalmol Vis Sci* 2010;51:2732.
- (366) Saad A, Luce D, Gatinel D. Biomechanical Profiles of Keratoconus Suspect Eyes. *Invest Ophthalmol Vis Sci* 2010;51:4987.
- (367) Sabeti F, Maddess T, James A. Dichoptic Multifocal Pupillography Identifies Retinal Dysfunction in Early Age-Related Macular Degeneration. *Invest Ophthalmol Vis Sci* 2010;51:2794.
- (368) Saika M, Nakagawa T, Kitaguchi Y et al. Cut-Off Values in Root Mean Square(rms) of Ocular Higher-Order Aberrations for Differentiating Normal Eyes From Pathological Conditions. *Invest Ophthalmol Vis Sci* 2010;51:3967.
- (369) Sanfilippo P, Cardini A, Sigal IA et al. A Geometric Morphometric Assessment of the Optic Cup in Glaucoma. *Invest Ophthalmol Vis Sci* 2010;51:5560.
- (370) Sassani PP, Sample PA, Vizzeri G et al. The Influence of Race on the Detection of Glaucoma Using Scanning Laser Polarimetry With Variable Corneal Compensation in the African Descent and Glaucoma Evaluation Study (ADAGES) and Diagnostic Innovations in Glaucoma Study (DIGS). *Invest Ophthalmol Vis Sci* 2010;51:2731.

- (371) Schnyder CC, Oleszczuk J, Bergin C et al. Examining the Agreement of Structural Loss Measured With Heidelberg Retinal Tomography and Functional Loss With Standard Automated Perimetry (SAP; Octopus), Pulsar Perimetry (PP), and Moorfields Motion Displacement Test (MDT) Perimetry. *Invest Ophthalmol Vis Sci* 2010;51:4902.
- (372) Schulze A, Lamparter J, Pfeiffer N, Hoffmann EM. Comparison of Optic Disc Topographic Measurements Using Fourier-Domain Optical Coherence Tomography and Confocal Scanning Laser Ophthalmoscopy in Glaucoma Patients and Normal Subjects. *Invest Ophthalmol Vis Sci* 2010;51:4895.
- (373) Sejpal KD, Johnson D, Yu F, Hamilton DR. Advanced Assessment of Corneal Biomechanical Properties in Normal and Keratoconic Eyes Using the Ocular Response Analyzer. *Invest Ophthalmol Vis Sci* 2010;51:4991.
- (374) Shimabukuro M, Higashiura R, Fuchihata M et al. Screening of Keratoconus and Keratoconus Suspects Using Rotating Scheimpflug Corneal Topography. *Invest Ophthalmol Vis Sci* 2010;51:4992.
- (375) Sinapis D, Sinapis A, Bergin C et al. Perimetry Instrument Comparison Study: Comparing the Diagnostic Performance of Four Threshold Perimetry Tests to Discriminate Between Healthy and 'Glaucomatous' Eyes (Interim Analysis). *Invest Ophthalmol Vis Sci* 2010;51:5504.
- (376) Sinha Roy A, Ambrosio R, Canedo ALC, Guerra FP, Lousada R, Dupps WJ. Zernike Analysis of Abnormal Corneal Thickness and Biomechanical Characteristics of Keratoconus Eyes. *Invest Ophthalmol Vis Sci* 2010;51:4635.
- (377) Skalet AH, Ausayakhun S, Ausayakhun S et al. Telemedicine for Cytomegalovirus (CMV) Retinitis. *Invest Ophthalmol Vis Sci* 2010;51:4851.
- (378) Smolek MK, Lebow K, Notaroberto N, Pallikaris A, Vujosevic S. Neural Network Algorithms for a Device to Measure Macular Visual Sensitivity. *Invest Ophthalmol Vis Sci* 2010;51:3550.
- (379) Stevens AM, Leloup E, De Bacquer D et al. Glaucoma and Fitness to Drive. *Invest Ophthalmol Vis Sci* 2010;51:208.
- (380) Sullivan BD, Eldridge DC, Berg M et al. Diagnostic Performance of Osmolarity Combined With Subset Markers of Dry Eye Disease in an Unstratified Patient Population. *Invest Ophthalmol Vis Sci* 2010;51:3380.
- (381) Tan GS, Li J, He M, Sakata L, Friedman DS, Aung T. Diagnostic Performance of Novel Morphological Parameters for the Screening of Narrow Angles. *Invest Ophthalmol Vis Sci* 2010;51:5529.
- (382) Tavares IM, Kara-Jose A, Barbosa DVC et al. Retinal Nerve Fiber Layer Thickness and Visual Sensitivity Using Spectral-Domain and Time-Domain Optical Coherence Tomography. *Invest Ophthalmol Vis Sci* 2010;51:4923.
- (383) Tomidokoro A, Hangai M, Yoshimura N, Araie M, Group DOS. Sensitivity and Specificity of Thickness Measurements of Macular Ganglion Cell Layer and Ganglion Cell Complex Using Spectral-Domain OCT for Diagnosis of Preperimetric or Early Glaucoma. *Invest Ophthalmol Vis Sci* 2010;51:216.
- (384) Ude KT, Boehm N, Wiegand M, Pfeiffer N, Grus FH. Dig Deeper Into the Tear Proteome: Advanced Protein Profiling in Dry Eye Patients. *Invest Ophthalmol Vis Sci* 2010;51:4140.
- (385) Usui S, Ikuno Y, Miki A, Matsushita K, Yasuno Y. Evaluation of the Choroidal Thickness Using High Penetration Optical Coherence Tomography With Long Wavelength in Highly Myopic Normal Tension Glaucoma. *Invest Ophthalmol Vis Sci* 2010;51:2747.
- (386) Vass C, Resch H, Resch-Wolfslehner C et al. Diagnostic Value of Macular Nerve Fiber Layer and Compound Ganglion Cell Plus Inner Plexiform Layer in Glaucoma Compared to Healthy Volunteers. *Invest Ophthalmol Vis Sci* 2010;51:2739.
- (387) Vezzola D, Viola F, Villani E et al. Infrared Ophthalmoscopy as Diagnostic Tool for Neurofibromatosis Type 1. *Invest Ophthalmol Vis Sci* 2010;51:2267.
- (388) Wainess RM, Dustin L, Rao NA, International VKHS. Ethnic Variations in Vogt-Koyanagi-Harada Disease Presentation. *Invest Ophthalmol Vis Sci* 2010;51:3539.
- (389) Walsh AC, Wildey RC, Lara C, Ouyang Y, Sadda SR. Detection of Fundus Abnormalities Using 3D-OCT versus Mydriatic Color Fundus Imaging. *Invest Ophthalmol Vis Sci* 2010;51:3863.
- (390) Wang Y, Garway-Heath DF, Sinapis C, Zhu H, Healey PR, Mitchell P. The Application of Scanning Laser Polarimetry (gdxvcc) in an Older Population and Its Diagnostic Value to Glaucoma. *Invest Ophthalmol Vis Sci* 2010;51:2975.
- (391) Wong AM, Colpa L. Sensitivity and Specificity of a New "Upright-Supine Test" to Differentiate Skew Deviation From Other Causes of Vertical Strabismus. *Invest Ophthalmol Vis Sci* 2010;51:1582.
- (392) Wong DW, Liu J, Tan N et al. Automatic Detection of Peripapillary Atrophy in Digital Fundus Photographs. *Invest Ophthalmol Vis Sci* 2010;51:1798.
- (393) Yamaguchi M, Kamao T, Kawasaki S et al. Ocular Surface Thermographer: A New Device for Dry Eye Screening. *Invest Ophthalmol Vis Sci* 2010;51:3365.

- (394) Yamauchi Y, Kemma H, Amano Y et al. Possible Automated Screening of Age-Related Macular Degeneration. *Invest Ophthalmol Vis Sci* 2010;51:294.
- (395) Ying GS, Maguire MG, Dobson V et al. Validity of Noncycloplegic Retinoscopy, Retinomax Autorefractor and SureSight Vision Screener for Detecting VIP-Targeted Eye Conditions. *Invest Ophthalmol Vis Sci* 2010;51:1704.
- (396) Zanei A, Vattovani O, Di Stefano G, Ravalico G, Tognetto D, Da Pozzo S. The Diagnostic Ability of the GDx-VCC Nerve Fiber Indicator (NFI) in Separating Healthy From Glaucomatous Eyes. *Invest Ophthalmol Vis Sci* 2010;51:4898.
- (397) Zheng C, Kwok C, Aquino MD et al. Comparing Machine Learning Classifier for Diagnosing Different Angle Closure Mechanisms from Anterior Segment Optical Coherence Tomography Imaging. *Invest Ophthalmol Vis Sci* 2010;51:5542.
- (398) Zhu H, Crabb DP, Artes PH. Improving the Classification of Abnormal Optic Discs Using Shape Analysis. *Invest Ophthalmol Vis Sci* 2010;51:2727.
- (399) Zhuang H, Wang Y, Zhou X, Xu J. A Novel Method for Tear Fluorescein Clearance Test Using Pentacam Scheimpflug Imaging System. *Invest Ophthalmol Vis Sci* 2010;51:3369.
